**Density-dependent resistance protects *Legionella pneumophila* from its own antimicrobial metabolite, HGA**

Tera C. Levin<sup>a#</sup>, Brian P. Goldspiel,<sup>a\*</sup>, Harmit S. Malik<sup>a,b</sup>

<sup>a</sup>Division of Basic Sciences, Fred Hutchinson Cancer Research Center, Seattle WA

<sup>b</sup>Howard Hughes Medical Institute, Fred Hutchinson Cancer Research Center, Seattle WA

\*Present address: Perelman School of Medicine, University of Pennsylvania, Philadelphia, PA

#Address correspondence to Tera C. Levin: [tlevin@fredhutch.org](mailto:tlevin@fredhutch.org)

## 1 **Abstract**

2 To persist in the extracellular state, the bacterial pathogen *Legionella pneumophila* must  
3 withstand competition from neighboring bacteria. Here, we find that *L. pneumophila* can  
4 antagonize the growth of neighboring *Legionella* species using a secreted inhibitor:  
5 HGA (homogentisic acid), the unstable, redox-active precursor molecule to *L.*  
6 *pneumophila*'s brown-black pigment. Unexpectedly, we find that *L. pneumophila* can  
7 itself be inhibited by HGA secreted from neighboring, isogenic strains. Our genetic  
8 approaches further identify *lpg1681* as a gene that modulates *L. pneumophila*  
9 susceptibility to HGA. We find that *L. pneumophila* sensitivity to HGA is density-  
10 dependent and cell intrinsic. This resistance is not mediated by the stringent response  
11 nor the previously described *Legionella* quorum-sensing pathway. Instead, we find that  
12 *L. pneumophila* cells secrete HGA only when they are conditionally HGA-resistant,  
13 which allows these bacteria to produce a potentially self-toxic molecule while restricting  
14 the opportunity for self-harm. We speculate that established *Legionella* communities  
15 may deploy molecules such as HGA as an unusual public good that can protect against  
16 invasion by low-density competitors.

## 17 **Introduction**

18 Inter-bacterial conflict is ubiquitous in nature, particularly in the dense and highly  
19 competitive microenvironments of biofilms (Davey and O'toole 2000; Foster and Bell  
20 2012; Ghigo and Rendueles 2015). In these settings, bacteria must battle for space and  
21 nutrients while evading antagonism by neighboring cells. One strategy for managing  
22 these environments is for bacteria to cooperate with their kin cells, sharing secreted  
23 molecules as public goods (Nadell, Drescher, and Foster 2016; Abisado et al. 2018).  
24 However, these public goods are vulnerable to exploitation by other species or by  
25 'cheater' bacterial strains that benefit from public goods but do not contribute to their  
26 production. For this reason, many bacteria participate in both cooperative and  
27 antagonistic behaviors to survive in multispecies biofilms. Bacterial antagonistic factors  
28 can range from small molecules to large proteins, delivered directly or by diffusion, and  
29 can either act on a broad spectrum of bacterial taxa or narrowly target only a few  
30 species. Although narrowly targeted mechanisms may seem to be of less utility than  
31 those that enable antagonism against diverse bacterial competitors, targeted strategies  
32 can be critical for bacterial success because they tend to mediate competition between  
33 closely-related organisms that are most likely to overlap in their requirements for  
34 restricted nutrients and niches (Hibbing et al. 2010).

35  
36 The bacterium *Legionella pneumophila* (*Lp*) naturally inhabits nutrient-poor  
37 aquatic environments where it undergoes a bi-phasic lifestyle, alternating between  
38 replication in host eukaryotes and residence in multi-species biofilms (Lau and Ashbolt  
39 2009; Declerck et al. 2007; Declerck 2010; Taylor, Ross, and Bentham 2013). If *Lp*  
40 undergoes this lifecycle within man-made structures such as cooling towers or showers,  
41 the bacterium can become aerosolized and cause outbreaks of a severe, pneumonia-  
42 like disease in humans, called Legionnaires' disease (Fraser et al. 1977; McDade et al.  
43 1977; Fields, Benson, and Besser 2002). Because of the serious consequences of *Lp*  
44 colonization, the persistence and growth of *Legionella* in aquatic environments has  
45 been the subject of numerous studies. These studies have examined replication within  
46 protozoan hosts (Rowbotham 1980; Isberg, O'Connor, and Heidtman 2008; Lau and  
47 Ashbolt 2009; Hoffmann, Harrison, and Hilbi 2014), survival in water under nutrient

48 stress (Li et al. 2015; Mendis, McBride, and Faucher 2015), and sensitivity to biocides  
49 (Kim et al. 2002; Lin, Stout, and Yu 2011). Here, we focus on interbacterial competition  
50 as an underappreciated survival challenge for *Lp*.

51  
52 *Legionella spp.* are not known to produce any antibiotics, bacteriocins, or other  
53 antibacterial toxins. Bioinformatic surveys of *Legionella* genomes have revealed a  
54 number of polyketide synthases and other loci that likely produce bioactive metabolites  
55 (Johnston et al. 2016; Tobias et al. 2016), but these have not been shown to exhibit any  
56 antimicrobial functions. Nevertheless, there are some hints that interbacterial  
57 competition is relevant for *Lp* success within biofilms. For example, one study of artificial  
58 two-species biofilms found that viable *Lp* were able to persist for over two weeks in the  
59 presence of several bacterial species (e.g. *Pseudomonas fluorescens*, *Klebsiella*  
60 *pneumoniae*) but not others (e.g. *Pseudomonas aeruginosa*) (Stewart, Muthye, and  
61 Cianciotto 2012). Additionally, *Lp* bacteria are often co-resident with other *Legionella*  
62 *spp.* in man-made structures, with some studies showing that *Lp* proliferation is  
63 correlated with a decrease in other *Legionella spp.* populations (Wery et al. 2008;  
64 Pereira et al. 2017; Declerck et al. 2007). These studies suggest that *Lp* bacteria may  
65 compete with other *Legionella spp.* for similar biological niches.

66  
67 The most direct evidence for interbacterial competition comes from Stewart et al.,  
68 2011, who found that *Lp* could antagonize the growth of neighboring *Legionella spp.* on  
69 the same plate (Stewart, Burnside, and Cianciotto 2011). The molecules mediating this  
70 competition have not been identified, although previous work suggested a role for *Lp*'s  
71 secreted surfactant, a thin liquid film that facilitates the spread of *Lp* across agar plates  
72 (Stewart, Rossier, and Cianciotto 2009; Stewart, Burnside, and Cianciotto 2011). Still, it  
73 remained unknown if surfactant played a direct or indirect role in inter-*Legionella*  
74 inhibition.

75  
76 Here, we use unbiased genetic approaches to find that homogentisic acid (HGA)  
77 produced by *Lp* inhibits the growth of neighboring *Legionella spp.* We find that HGA  
78 production co-occurs with surfactant production, but that these are independent,

79 separable phenomena. The redox state of HGA appears to be critical for its activity, as  
80 oxidized HGA-melanin pigment is inactive. Unexpectedly, we find that *Lp* itself is  
81 susceptible to HGA inhibition. We also identify one gene—*lpg1681*—that enhances *Lp*  
82 susceptibility to HGA. However, we find that *Lp* cells can be resistant to HGA at high-  
83 density, which is also when they secrete large amounts of HGA. This high-density  
84 resistance is cell intrinsic and appears to be independent of growth phase, the stringent  
85 response or the previously described quorum-sensing pathway in *Legionella*. Based on  
86 these findings, we propose that HGA has the potential to play an important role in  
87 structuring *Legionella* communities.

## 88 **Results**

89

### 90 ***L. pneumophila* inhibits *L. micdadei* via an unknown, secreted inhibitor**

91       Inspired by previous reports (Stewart, Burnside, and Cianciotto 2011), we  
92 investigated how *Legionella pneumophila* (*Lp*) engages in inter-*Legionella* competition.  
93 We found that *Lp* inhibited the growth of neighboring *Legionella micdadei* (*Lm*) plated 1  
94 cm away on solid media, suggesting that it produces a secreted inhibitor (Figure 1A).  
95 This inhibition was most robust when we plated the *Lp* strain on low-cysteine media 3-4  
96 days prior to plating *Lm*, allowing time for the inhibitory molecule to be produced and  
97 spread across the plate. To quantify this inhibition, we recovered *Lm* grown at different  
98 distances from *Lp*. After 48h incubation, we found a 10,000-fold difference in growth  
99 between *Lm* antagonized by *Lp* versus *Lm* plated outside of the zone of inhibition  
100 (Figure 1B).

101       Previous studies (Stewart, Burnside, and Cianciotto 2011) had proposed that  
102 inter-*Legionella* inhibition could be caused by *Lp*'s secreted surfactant, which is  
103 produced by *Lp* but not *Lm* (Stewart, Rossier, and Cianciotto 2009). We tested this  
104 hypothesis by deleting a surfactant biosynthesis gene, *bbcB*, from the *Lp* genome  
105 (Stewart, Burnside, and Cianciotto 2011). The resulting  $\Delta$ *bbcB* strain did not produce  
106 surfactant (Supplemental figure 1B), yet it still inhibited adjacent *Lm* (Figure 1A,  
107 Supplemental Figure 1C). When quantified, we observed nearly identical inhibition from  
108 both wild type *Lp* and  $\Delta$ *bbcB* *Lp* (Figure 1C) indicating that the surfactant did not  
109 enhance inhibition levels. Furthermore, we observed that the zone of inhibition

110 surrounding wildtype *Lp* did not always co-occur with the spread of the surfactant front  
111 (Supplemental figure 1A). From these results, we conclude that *L. pneumophila* can  
112 cause strong growth inhibition of neighboring *Legionella* using an unknown molecule

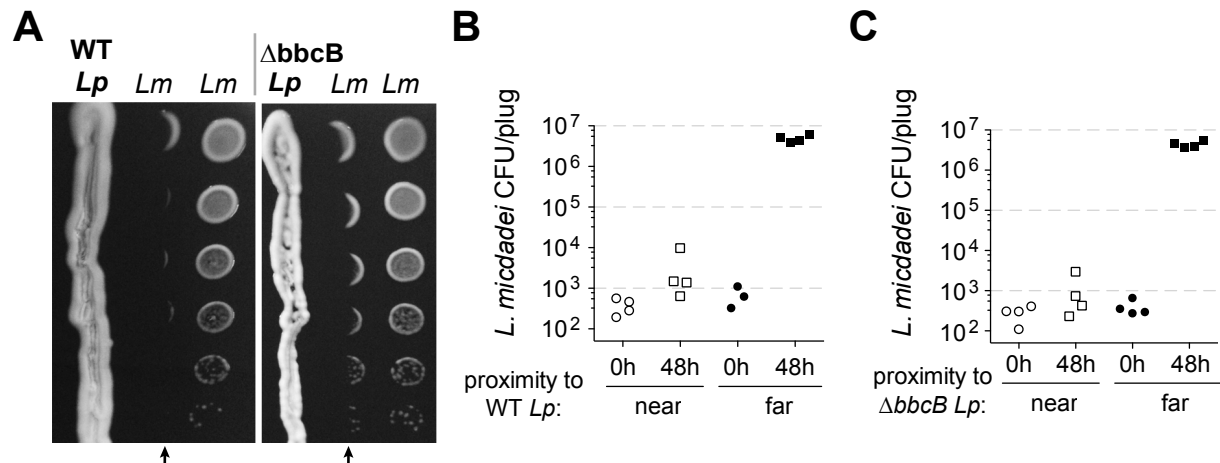

**Figure 1:** *L. pneumophila* (*Lp*) produces a secreted inhibitor independent of surfactant. A) When pre-incubated on BCYE charcoal agar plates, *Lp* produces a zone of inhibition, impacting the growth of nearby *L. micdadei* (*Lm*). Arrows mark the edge of inhibition fronts. Droplets of *Lm* at different dilutions were added to the plate 3 days after streaking *Lp*. Outside of the zone of inhibition, *Lm* grows in a circle where spotted on the plate, while inhibition either prevents growth completely or results in a crescent of growth away from *Lp*. WT *Lp* (left panel) generates a similar zone of inhibition as a surfactant-null mutant,  $\Delta bbcB$  (right panel). B) Quantification of *Lm* growth within ("near") or outside of ("far") the wild type *Lp* zone of inhibition. C) Quantification of *Lm* growth within or outside of the  $\Delta bbcB$  *Lp* zone of inhibition. In B and C bacteria were sampled and removed from the plate in a "plug" of fixed area before plating for viable CFUs.

113 that is distinct from surfactant.

114

### 115 Transposon screen pinpoints HGA-melanin pathway in inter-*Legionella* inhibition

116 To determine which molecule(s) might be responsible for inter-*Legionella*  
117 inhibition, we performed an unbiased genetic screen in *Lp*. We generated *Lp* mutants  
118 using a drug-marked Mariner transposon that randomly and efficiently integrates into  
119 the *Legionella* genome (O'Connor et al. 2011). To identify mutants that were defective in  
120 producing the inhibitor, we transferred each mutant onto a lawn of *L. micdadei* on low-  
121 cysteine plates and examined the resulting zone of inhibition surrounding each *Lp*  
122 mutant (Figure 2A). After screening 2870 clones, we isolated 19 mutants that produced  
123 a smaller zone of inhibition than wild type *Lp*, as well as 5 mutants that showed a  
124 complete loss of inhibition (Figure 2B, Supplemental Table 1). We refer to these as  
125 "small zone" and "no zone" mutants, respectively. Among the "small zone" mutants,  
126 some had defects in surfactant spreading on plates, while others enhanced surfactant

127 spread (Supplemental figure 2A), further distinguishing inter-bacterial inhibition from  
 128 surfactant secretion.

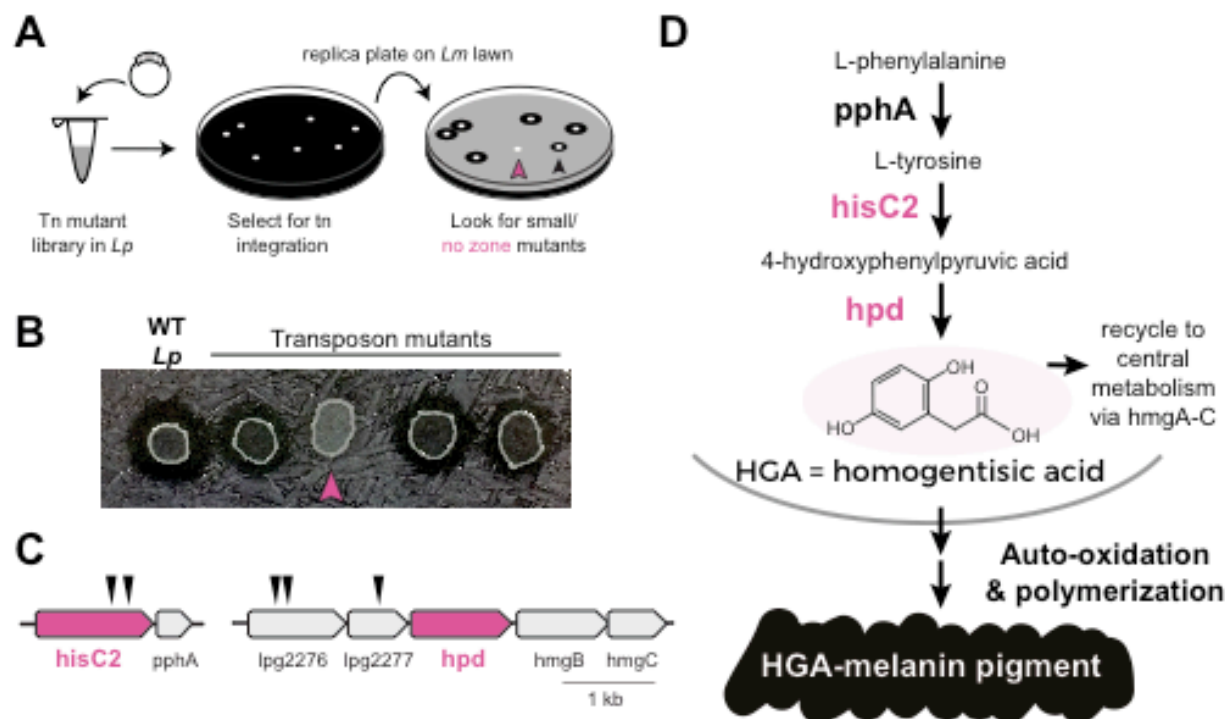

**Figure 2:** Transposon mutagenesis screen implicates HGA-melanin pathway in production of inhibitor. **A)** Screen for mutant *L. pneumophila* (*Lp*) that do not inhibit *L. micdadei* (*Lm*). Following electroporation of a Mariner-transposon-containing plasmid, *Lp* mutants were selected for transposon integration. Colonies were patched or replica plated onto a lawn of *Lm*. Mutants of interest generated a zone of inhibition that was reduced (black arrowhead) or absent (pink arrowhead) compared to WT *Lp*. **B)** Selected transposon mutants produce abnormal zones of inhibition when grown on a lawn of *Lm*. Pink arrowhead indicates the *hisC2*::Tn "no zone" mutant. **C)** Transposon insertion sites (triangles) identified in the five recovered "no zone" mutants. **D)** HGA-melanin synthesis pathway. HGA is exported from the cell where it auto-oxidizes and polymerizes to form HGA-melanin. Genes indicated in pink were validated by complementation to have essential roles in *Lm* inhibition.

129  
 130 We focused on the "no zone" mutants, as these had the strongest defects in  
 131 inhibition. These 5 mutants carried transposon insertions in two separate operons  
 132 (Figure 2C). The first operon had two insertions in the *hisC2* gene (*lpg1998*), which  
 133 breaks down tyrosine as part of the HGA-melanin metabolic pathway (Figure 2D). Its  
 134 downstream gene, *pphA*, converts phenylalanine to tyrosine in the same pathway. To  
 135 validate the role of *hisC2* in inhibition, we overexpressed this gene in the *hisC2*  
 136 transposon mutant background and found that *hisC2* alone was sufficient to  
 137 complement the mutant phenotype (Supplemental Figure 2B). Having confirmed the  
 138 role of *hisC2*, we turned to the second operon, where we had recovered transposon  
 139 insertions in two uncharacterized genes, *lpg2276* and *lpg2277* (Figure 2C). These two

140 genes lie immediately upstream of *hpd* (*lpg2278*), which is known to act with *hisC2* in  
141 the HGA-melanin pathway (Steinert et al. 2001; Gu et al. 1998) (Figure 2D). Because  
142 transposon insertions at the beginning of an operon can disrupt the expression of  
143 downstream genes via polar effects, we hypothesized that the insertions we recovered  
144 in *lpg2276* and *lpg2277* altered inter-*Legionella* inhibition via disruption of *hpd*  
145 expression. Indeed, we were able to complement insertions in both genes, which had  
146 yielded ‘no zone’ mutants, by overexpressing *hpd*, despite the fact that *hpd*  
147 overexpression caused a growth defect (Supplemental Figure 2B). In conclusion, all five  
148 “no zone” isolates had mutations that disrupted the same metabolic pathway involved in  
149 the production of HGA-melanin. Consistent with these findings, we observed defects in  
150 HGA-melanin pigmentation in all of the “no zone” mutants as well as some of the “small  
151 zone” mutants (Supplemental Figure 2E).

152

153 The HGA-melanin pathway is found in diverse eukaryotes and bacteria  
154 (Nosanchuk and Casadevall 2003; Liu and Nizet 2009) including *L. pneumophila*  
155 (Supplemental figure 2D). This pathway produces homogentisic acid (HGA) from the  
156 catabolism of phenylalanine or tyrosine (Fang, Yu, and Vickers 1989; Steinert et al.  
157 2001) (Figure 2D). HGA can either be further metabolized and recycled within the cell  
158 via HmgA-C, or it can be secreted outside of the cell, where it auto-oxidizes and  
159 polymerizes to form a black-brown pigment called HGA-melanin, or pyomelanin (Kotob  
160 et al. 1995) (Figure 2D). To test whether intracellular metabolites downstream of HGA  
161 are necessary for inhibition, we deleted *hmgA*, the first gene in the pathway that  
162 recycles HGA back into central metabolism. We found that the  $\Delta hmgA$  strain produced  
163 a zone of inhibition that was similar or slightly larger than wild type (Supplemental  
164 Figure 2C). We therefore inferred that synthesis of secreted HGA and/or HGA-melanin,  
165 but not its recycling and intracellular processing, is required for *Lp* inhibition of *Lm*.

166

### 167 **HGA inhibits the growth of *Legionella micdadei*, but HGA-melanin does not**

168 To our knowledge, the HGA-melanin pathway has not previously been implicated  
169 in inter-bacterial competition. To the contrary, prior work has emphasized the beneficial  
170 (rather than detrimental) effects of HGA-melanin on *Legionella* growth, by providing



171 improved iron scavenging (Chatfield and Cianciotto 2007) and protection from light  
 172 (Steinert et al. 1995). We therefore asked whether the active inhibitor produced by the  
 173 pathway was HGA-  
 174 melanin, or  
 175 alternatively a  
 176 precursor molecule  
 177 (Figure 3A). We  
 178 tested the potential  
 179 inhibitory activity of  
 180 HGA-melanin  
 181 pigment from *Lp*  
 182 conditioned media  
 183 in multiple  
 184 experiments;  
 185 however, we never  
 186 observed any  
 187 inhibition of *Lm*. We  
 188 wished to rule out  
 189 the possibility that  
 190 the pigment  
 191 secreted into rich  
 192 media was too dilute  
 193 to be active, or that  
 194 other nutrients in the  
 195 media might  
 196 interfere with  
 197 inhibition. We,  
 198 therefore, isolated a  
 199 crude extract of  
 200 HGA-melanin from  
 201 *Lp* conditioned

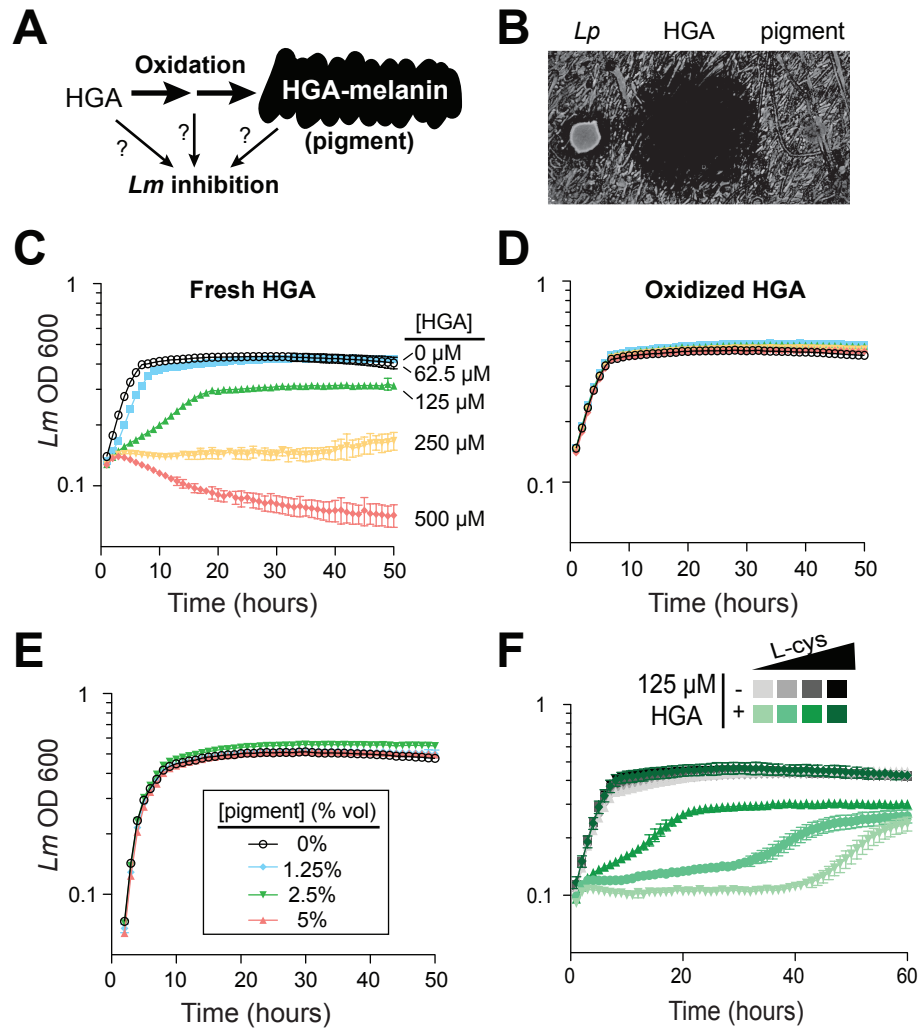

**Figure 3:** Synthetic HGA inhibits *Legionella micdadei* growth, depending on its oxidation state. **A)** We tested whether inter-bacterial inhibition is caused by HGA, HGA-melanin, or an oxidative intermediate. **B)** Zones of inhibition on a lawn of *Lm* generated from live *Lp* bacteria, synthetic 50mM HGA, or concentrated pigment extract. HGA prevents *Lm* growth in a large region (central dark circle) but pigment does not. **C)** Growth inhibition of *Lm* from increasing concentrations of synthetic HGA in rich AYE media. **D)** Pre-oxidation of synthetic HGA in AYE media for 24h eliminates its inhibitory activity, resulting in normal *Lm* growth. Concentrations of HGA colored as in panel C. **E)** Addition of oxidized HGA-melanin pigment from *L. pneumophila* has little impact on *Lm* growth in AYE liquid media. **F)** In the absence of HGA (gray symbols), titration of L-cysteine (L-cys) from 25%-200% of standard AYE media has little impact on *Lm* growth. However, HGA activity is enhanced in low-cysteine media and decreased in high-cysteine media (green symbols). All error bars show standard deviations among 3-4 replicates.

202 media via acid precipitation (as in (Chatfield and Cianciotto 2007)), washed and  
203 concentrated the pigment approximately 10-fold and repeated the assay; the  
204 concentrated pigment also showed no inhibitory activity (Figure 3B, 3E).

205

206 The first metabolite secreted by the HGA-melanin pathway is HGA. We tested  
207 whether HGA could behave as an inhibitor even though HGA-melanin could not.  
208 Indeed, we found that synthetic HGA robustly inhibited *Lm* growth, both when spotted  
209 onto a lawn of *Lm* and when titrated into AYE rich media (Figure 3B, 3C), We found that  
210 inhibition of *Lm* by HGA is relatively specific at the molecular level; neither 2-  
211 hydroxyphenylacetic acid nor 3-hydroxyphenylacetic acid, two HGA-related molecules  
212 that differ from HGA by only a single -OH group, were able to inhibit *Lm* growth at any  
213 concentration tested (Supplemental figure 3A).

214

215 Because HGA, but not HGA-melanin can inhibit *Lm* growth (Figure 3B, 3E), we  
216 inferred that the oxidative state of HGA might be important to its inhibitory activity. HGA  
217 is a reactive molecule, which auto-oxidizes (Eslami, Namazian, and Zare 2013) and  
218 polymerizes to form HGA-melanin through a series of non-enzymatic steps that are not  
219 genetically encoded (Steinert et al. 2001) and are therefore undetectable by our genetic  
220 screen. Given its auto-oxidative potential, we next tested whether HGA might cause  
221 growth inhibition by oxidizing other nearby molecules, either in the media or on bacterial  
222 cells. We allowed synthetic HGA to oxidize completely for 24h in AYE media before  
223 adding *Lm* (Supplemental Figure 4D). We found that pre-oxidation completely abolished  
224 synthetic HGA activity, even at very high HGA concentrations (Figure 3D, compare to  
225 3C). This experiment also ruled out the possibility that HGA acts by causing nutrient  
226 depletion or other modifications of the media, since media pre-incubated with HGA for  
227 24h is still able to support normal *Lm* growth. Instead, we infer that *Lm* inhibition results  
228 from direct interactions between bacterial cells and either HGA itself or unstable,  
229 reactive intermediates produced during HGA oxidation.

230

231 Small, reactive, quinone-like molecules similar to HGA are known to react with  
232 oxygen to produce H<sub>2</sub>O<sub>2</sub>, which is broadly toxic to bacteria (Hassan and Fridovich

233 1980). In such cases, extracellular catalase has been shown to protect bacteria against  
234 the toxic effects of H<sub>2</sub>O<sub>2</sub> (Hassan and Fridovich 1980; Imlay 2013). To test if HGA  
235 toxicity occurs via a similar mechanism as H<sub>2</sub>O<sub>2</sub>, we asked if extracellular catalase was  
236 sufficient to protect *Lm* from HGA-mediated toxicity. Even at very high catalase  
237 concentrations, we found that catalase provided no protection from HGA (Supplemental  
238 Figure 3B), ruling out the production of extracellular H<sub>2</sub>O<sub>2</sub> as a potential mechanism of  
239 action for HGA-mediated inhibition. We also considered the possibility that HGA as a  
240 weak acid could inhibit *Lm* indirectly by altering the local pH, but we observed that  
241 adding HGA at 1mM into AYE media or PBS caused little to no change in pH.

242  
243         Given that the redox state of HGA is critical for inhibition, we reasoned that it  
244 should be possible to modulate HGA activity by altering the redox state of the media  
245 using reducing agents. We accomplished this by titrating L-cysteine from 25% to 200%  
246 of the levels in standard AYE media. In the absence of HGA, these altered cysteine  
247 concentrations had little impact on *Lm* growth (Figure 3F). However, lower cysteine  
248 concentrations greatly sensitized *Lm* to HGA, while excess cysteine was completely  
249 protective (Figure 3F). These findings may help partially explain why HGA's inhibitory  
250 activity on *Legionella* has not been previously detected, as *Legionella* species are  
251 typically studied in cysteine-rich media. We found that synthetic HGA is readily able to  
252 react with cysteine in vitro (Supplemental Figure 3D) presumably impacting the  
253 oxidation state of HGA. Moreover, incubation of HGA with two other reducing agents,  
254 DTT (dithiothreitol) or reduced glutathione, similarly quenched HGA's inhibitory activity  
255 (Supplemental Figure 3E). From these experiments, we conclude that HGA is less  
256 potent in rich media because it reacts with excess cysteine (or other bystander  
257 molecules) before it can interact with *Lm*. In sum, these results implicate the reactive  
258 activity of HGA and/or its transient, oxidative intermediates in inter-*Legionella* inhibition.

259  
260         In these experiments, synthetic HGA was a robust inhibitor of *Lm*. However, this  
261 inhibition required relatively high concentrations of HGA (>50μM). We next quantified  
262 the amount of HGA secreted by *Lp* to determine if these levels were biologically  
263 relevant. Compared to other *Legionella spp.*, *Lp* produces much more pigment

264 (Supplemental Figure 2D), suggesting that it secretes considerably more HGA. To  
265 estimate the quantity of secreted HGA, we created a standard curve of synthetic HGA in  
266 AYE rich media. We allowed the HGA added to completely oxidize to HGA-melanin,  
267 which can be measured by OD 400 readings. In this way, we can use the pigment levels  
268 after oxidation as a reliable measure of total HGA that was produced by a given time-  
269 point (Supplemental Figure 4D). Using this calibration, we estimated that wild type *Lp*  
270 had secreted the equivalent of 1.7mM HGA after 48h of culture, whereas the  
271 hyperpigmented  $\Delta hmgA$  strain secreted about 2.6mM HGA. Thus, the levels of HGA  
272 produced by *Lp* are considerably higher than the inhibitory concentrations of synthetic  
273 HGA used in our assays (50-500  $\mu$ M), at least under lab conditions. In contrast, we did  
274 not detect any pigment from the non-inhibitory *hisC2::Tn* strain (Supplemental figure  
275 4E). From these experiments, we conclude that HGA is an abundant, secreted, redox-  
276 active metabolite of *Lp*, which can accumulate in concentrations that are relevant for  
277 inter-*Legionella* inhibition.

278

### 279 ***L. pneumophila* can be susceptible to its own inhibitor**

280 Our results so far indicated that HGA can be a potent, redox-active inhibitor of  
281 *Lm*, which is volatile and capable of reacting with many types of thiol-containing  
282 molecules. If *Lp* uses HGA to compete with neighboring *Legionella spp.*, we anticipated  
283 that that *Lp* would have evolved some form of resistance to its own secreted inhibitor.  
284 Therefore, we next tested *Lp* susceptibility to inhibition in low-cysteine conditions, as we  
285 had previously done for *Lm*. Surprisingly, we found that *Lp* was quite sensitive to  
286 inhibition by neighboring *Lp* that was already growing on the plate (Figure 4A). Indeed,  
287 *Lp* susceptibility closely mirrored the susceptibility of *Lm* to inhibition (compare to Figure  
288 1A), even though the bacterial cells secreting the inhibitor were genetically identical to  
289 the inhibited *Lp*. In both cases, we observed a sharp boundary at the edge of the zone  
290 of inhibition. In contrast, the “no zone” *Lp* strain *hisC2::Tn* did not generate a sharp zone  
291 of inhibition against neighboring *Lp* (Figure 4A), suggesting that the HGA-melanin  
292 pathway was responsible for both *Lm* and *Lp* inhibition. Furthermore, we found that  
293 synthetic HGA was able to inhibit *Lp* in liquid cultures (Figure 4B) at the same  
294 concentrations that were inhibitory to *Lm* (compare Figure 4B and 3C).

295

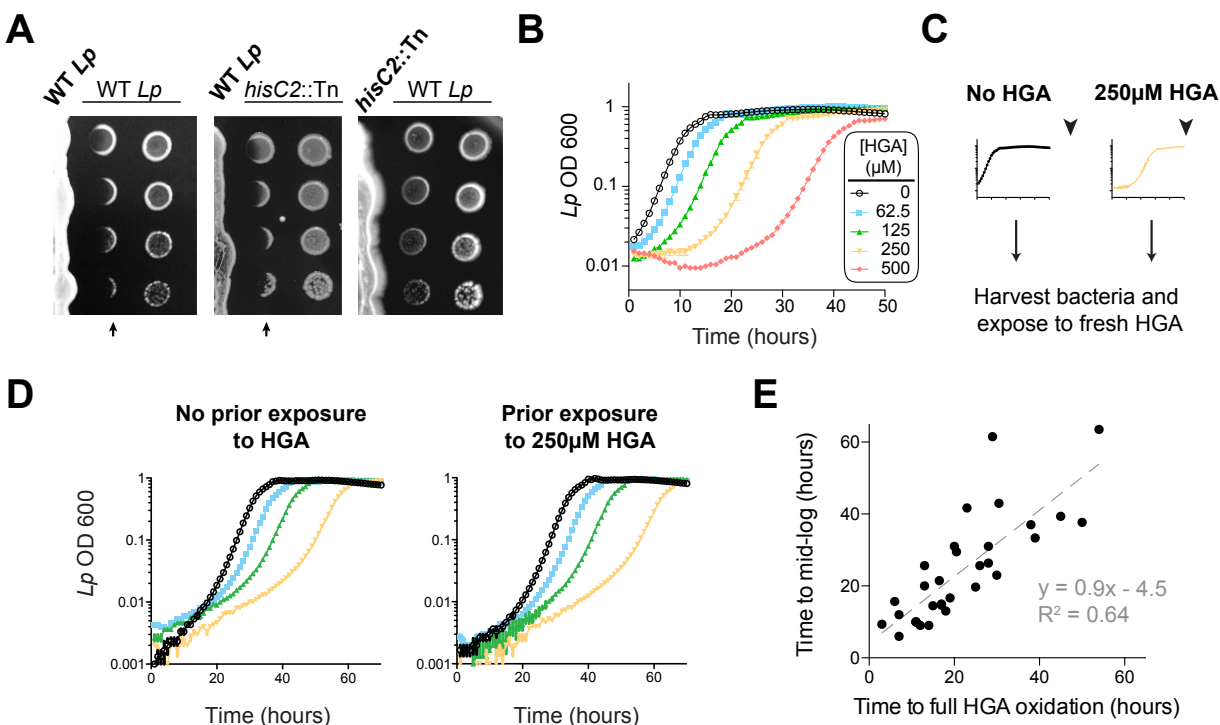

**Figure 4:** *L. pneumophila* is susceptible inhibition by HGA. **A)** When pre-incubated on agar plates, *Lp* produces a zone of inhibition (arrows), preventing the growth of genetically-identical *Lp* plated 3 days later. The “no zone” mutant *hisC2::Tn* does not produce a sharp front of inhibition, implicating HGA. **B)** Increasing concentrations of synthetic HGA inhibit the growth of *Lp*, causing a growth delay in rich media. Error bars showing standard deviation are small and mostly obscured by the symbols. **C)** To test if *Lp* population recovery at late time points following HGA exposure is due to the outgrowth of HGA-resistant mutants, we grew *Lp* with or without HGA and sampled bacteria at the end of the experiment (arrowhead) that were unexposed to HGA or were exposed to 250µM HGA. These were used to inoculate media +/- fresh HGA. **D)** Prior HGA exposure did not lead to subsequent resistance. **E)** The time for *Lp* to grow in the presence of HGA is correlated with the time for synthetic HGA to oxidize at each concentration, suggesting that *Lp* delays growth until HGA has sufficiently oxidized to lose inhibitory activity. Plot shows data combined across 8 experiments. Linear fit curve and equation are shown.

296

However, our comparisons between *Lm* and *Lp* revealed one important

297

difference in their response to HGA inhibition. Unlike *Lm*, the *Lp* cultures exposed to

298

HGA exhibited a population rebound after a dose-dependent growth delay, measured

299

by both OD600 and plating for viable CFUs (Figure 4B, Supplemental Figure 4C). This

300

rebound response was shared between the KS79 lab strain and the Philadelphia-1

301

original *Lp* strain (Supplemental Figure 4A). We hypothesized that the *Lp* rebound

302

response following HGA inhibition occurs because of selection and outgrowth of HGA-

303

resistant mutants following exposure. To test this possibility, we collected ‘post-rebound’

304

stationary phase *Lp* previously exposed to 250µM HGA and compared their subsequent

305

HGA sensitivity to unexposed *Lp* (Figure 4C-D). We found that both cultures showed

306

nearly identical susceptibility to HGA inhibition, suggesting that *Lp* population rebounds

307

are not driven by genetic adaptation.

308

309 We therefore considered an alternate possibility that *Lp* populations exposed to  
310 HGA remain static until HGA levels fall below inhibitory concentrations, reflecting the  
311 auto-oxidation and loss of HGA activity over time. This possibility was supported by  
312 CFU measurements, which showed that HGA is bacteriostatic but not bacteriocidal  
313 against *Lp* during the growth delay (Supplemental Figure 4C). Furthermore, we  
314 observed a strong, linear correlation between the time required to fully oxidize a given  
315 concentration of HGA and the length of the growth delay induced by *Lp* (Figure 4E).  
316 Based on our multiple observations, we favor the parsimonious conclusions that  
317 synthetic HGA causes initial, bacteriostatic inhibition of *Lp* until it has been sufficiently  
318 oxidized and thereby inactivated, enabling *Lp* growth. We note that the liquid culture  
319 assays (Figure 4B) differ from the co-plating assays, in which we did not observe *Lp*  
320 rebound (Figure 4A). In the latter case, we presume that bacteria continually secrete  
321 fresh HGA to replace the oxidized HGA over time. Thus, our results confirm a surprising  
322 role for HGA in both interspecies and intraspecies *Legionella* inhibition.

323

### 324 **Non-essential gene *lpg1681* sensitizes *L. pneumophila* to HGA**

325 We next investigated the molecular basis of *L. pneumophila* susceptibility and  
326 resistance to HGA using bacterial genetics. First, we tested the role of the HmgA-C  
327 proteins, which break down intracellular HGA and recycle it back into central  
328 metabolism. We hypothesized that HmgA-C proteins might also be able to deactivate  
329 extracellular HGA (Rodriguez-Rojas et al. 2009) (Figure 2D). Contrary to this  
330 hypothesis, we found that the growth response of the  $\Delta hmgA$  mutant to increasing  
331 concentrations of synthetic HGA was nearly identical to that of wild type *Lp*  
332 (Supplemental Figure 4B). These results suggest that the intracellular recycling pathway  
333 does not play an appreciable role in *Lp* resistance to extracellular HGA.

334

335 Having excluded the obvious candidate pathway for *Lp* resistance to HGA, we  
336 pursued an unbiased forward genetics approach. Because HGA is strongly inhibitory to  
337 low density bacteria, we performed a selection for spontaneous, HGA-resistant mutants  
338 of *Lp* and *Lm* using a high HGA concentration that normally prevents almost all growth

339 for both species. To prevent  
 340 HGA from reacting with media  
 341 components and becoming  
 342 inactive (as in Figure 3D, 3F),  
 343 we mixed the bacteria with  
 344 1mM HGA in agar overlays  
 345 poured onto low-cysteine  
 346 BCYE plates (Figure 5A).  
 347 After six days, an average of  
 348 53 colonies had grown up on  
 349 each *Lp* plate under HGA  
 350 selection, whereas only 3-5  
 351 colonies grew on *Lm* plates  
 352 exposed to with HGA. We  
 353 also found only 3-5 colonies  
 354 of either *Lm* or *Lp* exposed to  
 355 low-cysteine plates without  
 356 HGA. Based on these results,  
 357 we focused on HGA-selected  
 358 mutants of *Lp*. We retested  
 359 the phenotypes of  
 360 spontaneous mutants on  
 361 HGA + low-cysteine plates  
 362 and recovered 29 *Lp* strains  
 363 that consistently grew better  
 364 than wild type *Lp* (Figure 5B).  
 365 Notably, all recovered  
 366 mutants had a decrease in  
 367 HGA sensitivity relative to  
 368 wild type, but none were  
 369 completely resistant.

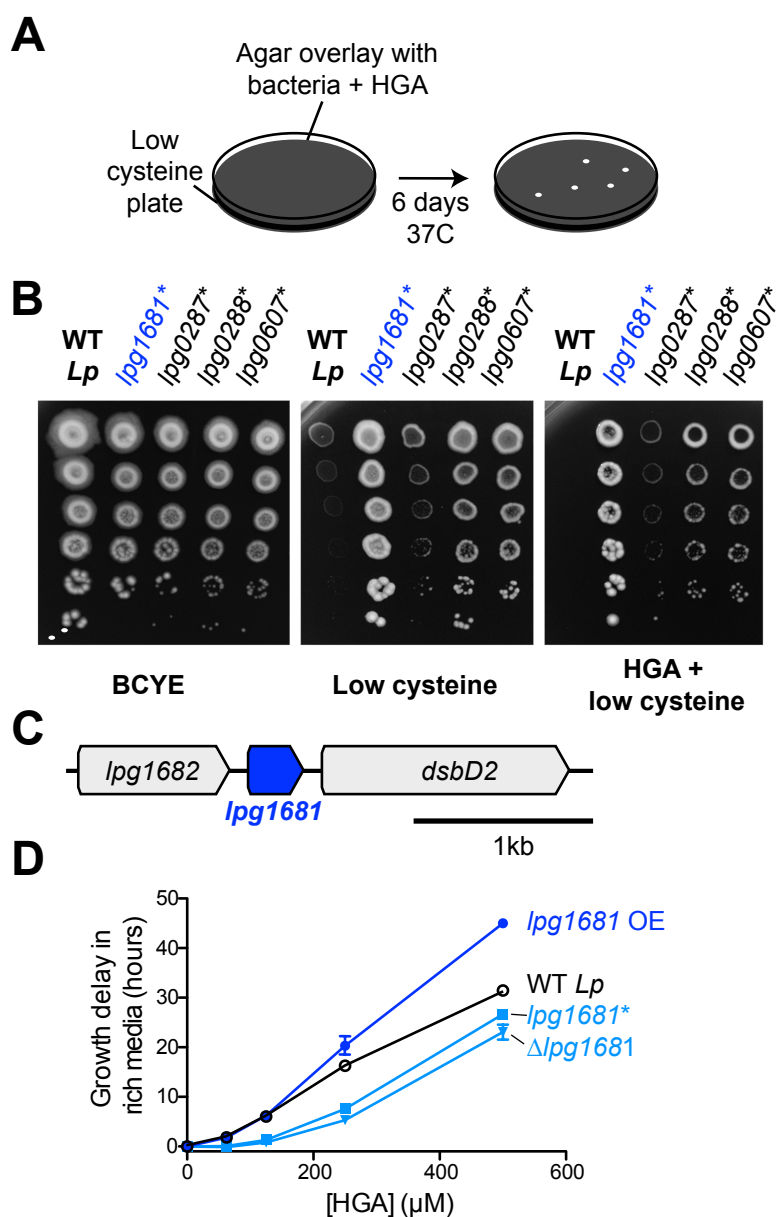

**Figure 5:** *L. pneumophila* susceptibility to HGA is modulated by *lpg1681*. **A)** Scheme to select for *Lp* spontaneous HGA-resistant mutants. **B)** Growth of HGA-selected mutants (\*) compared to wild type *Lp*. All isolates grew better than wild type in selection conditions (HGA + low cysteine), as well in low cysteine conditions. **C)** Syntenic region of *lpg1681* in *Lp* strains. *lpg1681* is a hypothetical gene that lies downstream of *lpg1682*, a predicted oxidoreductase/dehydrogenase, and upstream of *dsbD2*, a thiol:disulfide interchange protein. **D)** In rich media, a spontaneous *lpg1681* mutant (*lpg1681\**) and the *lpg1681* deletion strain ( $\Delta$ *lpg1681*) are less sensitive to growth inhibition by HGA than wild type *Lp*, as seen by a shorter growth delay at each concentration of HGA. Overexpression of *lpg1681* (OE) heightens sensitivity to HGA (longer growth delay). Graphs here summarize experiments similar to those in Fig 4B. See Supplemental Figure 8 for full data.

370

371 To determine the underlying genetic basis of these phenotypes, we sequenced  
372 the genomes of all 29 strains plus the starting, wildtype strain of *Lp* to a median depth of  
373 118x and identified mutations genome-wide. Each mutant strain carried 1 to 3 unique  
374 point mutations relative to the starting strain, but most of these mutations were found  
375 only in a few shared loci (Table 1). The most abundant category of mutants was genes  
376 related to translation. 19 of 29 resistant *Lp* strains carried mutations in translation-  
377 related machinery, of which 17 carried mutations in elongation factor P (*lpg0287*) or  
378 enzymes responsible for adding post-translational modifications to elongation factor P  
379 (*lpg0607* and *lpg0288*). Elongation factor P acts to re-start stalled ribosomes at  
380 polyproline tracts, and its post-translational modifications are essential for these  
381 functions (Yanagisawa et al. 2010; Navarre et al. 2010; Doerfel et al. 2013; Marman,  
382 Mey, and Payne 2014). Based on the frequency of polyprolines in the *Lp* proteome,  
383 disruptions to elongation factor P function have the potential to impact the expression of  
384 about 33% of *Lp* proteins. The HGA resistance phenotypes we observed in these 17 *Lp*  
385 mutants could therefore result from either a large-scale shift in gene expression, or from  
386 the altered expression of specific susceptibility genes.

387

388 Elongation factor P disruption has also been previously linked to the activation of  
389 the stringent response pathway (Nam et al. 2016), which is important for coordinating a  
390 variety of stress responses in *Legionella* including oxidative stress (Molofsky and  
391 Swanson 2004; Oliva, Sahr, and Buchrieser 2018). We therefore tested if the stringent  
392 response pathway is involved in regulating HGA susceptibility or resistance. We  
393 assayed HGA susceptibility in mutant *Lp* strains with disruptions to *rpoS*, *letA*, *relA*, and  
394 *spoT*, which act early in the stringent response pathway to regulate and/or respond to  
395 the levels of the alarmone ppGpp (Supplemental Figure 7C) (Bachman and Swanson  
396 2001; Hammer, Tateda, and Swanson 2002; Dalebroux, Edwards, and Swanson 2009).  
397 We found that the HGA susceptibility of all these mutants was similar to that of wild  
398 type; furthermore, complementation with these genes did not alter HGA susceptibility  
399 (Supplemental Figure 7D). Thus, we find no evidence of a role for the stringent  
400 response in HGA susceptibility or resistance. Instead, we propose that disruptions to



401 elongation factor P result in pleiotropic translation defects that together lead to HGA  
402 resistance via still-unknown mechanisms. In addition to the translation-related mutants,  
403 we found 5 missense mutations in *secY* or *secD* (*lpg0349* and *lpg2001*), members of  
404 the Sec secretion apparatus that moves polypeptides across the cytosolic membrane; 1  
405 mutation in *aceE* pyruvate dehydrogenase (*lpg1504*); and 4 mutations in a hypothetical  
406 gene, *lpg1681* (Table 1, Figure 5C). The Sec apparatus is involved in the secretion of  
407 many substrates and mutations to this machinery could also lead to extensive  
408 pleiotropic defects.

409

410         Instead, we focused on the relatively uncharacterized hypothetical gene *lpg1681*,  
411 which encodes a small, 105 amino acid protein with no predicted domains apart from  
412 two transmembrane helices. This gene is adjacent in the genome to *lpg1682*, which  
413 encodes for a predicted oxidoreductase/dehydrogenase, and *lpg1680*, which encodes  
414 for the thiol:disulfide exchange protein DsbD2 (Figure 5C, Supplemental Figure 6).  
415 Functional studies of DsbD2 (aka DiSulfide Bond reductase D2) have demonstrated that  
416 it interacts with thioredoxin to regulate disulfide bond remodeling in the periplasm (Inaba  
417 2009; Kpadeh et al. 2015). If *lpg1681* has a redox function related to its neighboring  
418 genes, we expected its syntenic locus to be conserved across bacterial strains and  
419 species. Consistent with this prediction, we found that the *lpg1680-1682* locus is  
420 present and conserved among over 500 sequenced *Lp* strains currently in NCBI  
421 databases. Outside *L. pneumophila*, *lpg1681* is mostly restricted to the *Legionella*  
422 genus, present in about half of the currently sequenced species (Burstein et al. 2016)  
423 (Supplemental Figure 6). A homolog of *lpg1681* is also found in the draft genome of  
424 *Piscirickettsia litoralis*, a gamma proteobacterium and fish pathogen (Wan et al. 2016).  
425 In all cases, *lpg1681* resides upstream of *dsbD2*, suggesting a functional link between  
426 these proteins (Supplemental Figure 6) and implicating *lpg1681* in a role in redox  
427 homeostasis. We, therefore, viewed *lpg1681* as a promising candidate for a gene  
428 involved in HGA susceptibility.

429

430         We constructed *lpg1681* overexpression and deletion strains in *Lp* and tested the  
431 susceptibility of these strains to HGA. Similar to the spontaneous mutants we

432 recovered, we found that the  $\Delta lpg1681$  strain was more resistant to synthetic HGA in  
433 rich media (Figure 5D, Supplemental Figure 5). Conversely, overexpression of *lpg1681*  
434 increased *Lp* sensitivity, resulting in longer growth delays than wild type at high  
435 concentrations of HGA. We therefore conclude that wild type *lpg1681* expression  
436 sensitizes *Lp* to inhibition by extracellular HGA. Given its genetic linkage with *DsbD*, our  
437 findings further suggest that alteration of disulfide bond regulation in the periplasm  
438 might constitute one means to mitigate HGA susceptibility.

439

#### 440 ***L. pneumophila* susceptibility to HGA is density-dependent**

441 Our unbiased genetic screen for *Lp* resistance to HGA only revealed mutants  
442 that were partially resistant to HGA. These mutants had a smaller growth delay than  
443 wild type at a given HGA concentration, but all remained qualitatively susceptible to  
444 inhibition. These results suggest that the genetic routes for *Lp* to completely escape  
445 from HGA-mediated inhibition are limited. Yet, *Lp* secretes abundant HGA into its local  
446 environment, despite the fact that HGA secretion is not required for *Lp* growth or  
447 metabolism (as seen by the robust growth of the *hisC2::Tn* mutants, Figures 2 and 4).  
448 Thus, our findings do not provide an adequate explanation for the paradox of how *Lp*  
449 cells can secrete a toxic compound to which they apparently carry no heritable  
450 resistance.

451

452 We therefore considered a distinct mechanism by which *Lp* might avoid self-  
453 inhibition: *Lp* might produce and secrete HGA only during conditions to when it is not  
454 susceptible to HGA. To address this possibility, we investigated when and where *Lp*  
455 secretes HGA. We tracked HGA secretion across a growth curve of *Lp* in rich media,  
456 using our previously described assay of using a standard curve of synthetic HGA to  
457 estimate HGA levels. It has long been known that *Lp* produces abundant HGA-melanin  
458 pigment in stationary phase, when the bacteria are undergoing very slow or no growth  
459 (Pine et al. 1979; Berg et al. 1985; Wiater, Sadosky, and Shuman 1994). By comparing  
460 to a synthetic HGA standard curve (Supplemental Figure 4F), we estimate that *Lp*  
461 produces a burst of HGA in stationary phase, secreting over 250 $\mu$ M within 5 hours  
462 (Figure 6A). HGA secretion then continues after the population has ceased growing.

463 These quantities of HGA are more than enough to be inhibitory to *Lp* growth (Figure  
464 4B).

465  
466 For *Lp* to avoid self-inhibition from HGA, we hypothesized that *Lp* might be  
467 resistant to this inhibitor at high density and/or when the cells are in a stationary phase  
468 of growth. We therefore investigated if cell density or growth phase impacted HGA  
469 susceptibility (Figure 6B). For *Lp* exposed to HGA in rich media, we found that the  
470 growth phase of bacteria used to inoculate the experiment had little impact on HGA  
471 susceptibility (Figure 6C). In contrast, when cells were inoculated at high density  
472 ( $10^9$ /mL instead of  $10^8$ /mL), they were resistant even to high concentrations of HGA  
473 (Figure 6C), suggesting that cell density might be linked to HGA resistance. However,  
474 because both cell density and growth phase are changing over time during our assays  
475 in rich media, we cannot fully separate their contributions to HGA-resistance in *Lp*. We  
476 therefore created a new assay to assess HGA susceptibility. We exposed *Lp* bacteria to  
477 HGA at different dilutions in nutrient-free PBS, which ensured that the bacteria did not  
478 grow or change cell density during the course of the experiment. After 24 hours  
479 exposure to 125 $\mu$ M HGA, we assessed bacterial viability by plating for viable CFUs  
480 (Figure 6D). No measurable darkening of the HGA was detected in this assay,  
481 suggesting that the oxidation and de-activation of HGA was considerably slowed in low-  
482 nutrient conditions. We found that *Lp* bacteria incubated at high density with HGA  
483 (above  $10^8$  CFU/mL) were largely protected from inhibition (Figure 6D). However, at  
484 lower density ( $10^7$  CFU/mL), *Lp* bacteria were extremely sensitive to HGA, with at  
485 least a  $10^6$ -fold reduction in CFUs, to below our limit of detection. As in the rich media  
486 assay, this density-dependent resistance to HGA was not altered by inoculum growth  
487 phase (Figure  
488 6D).

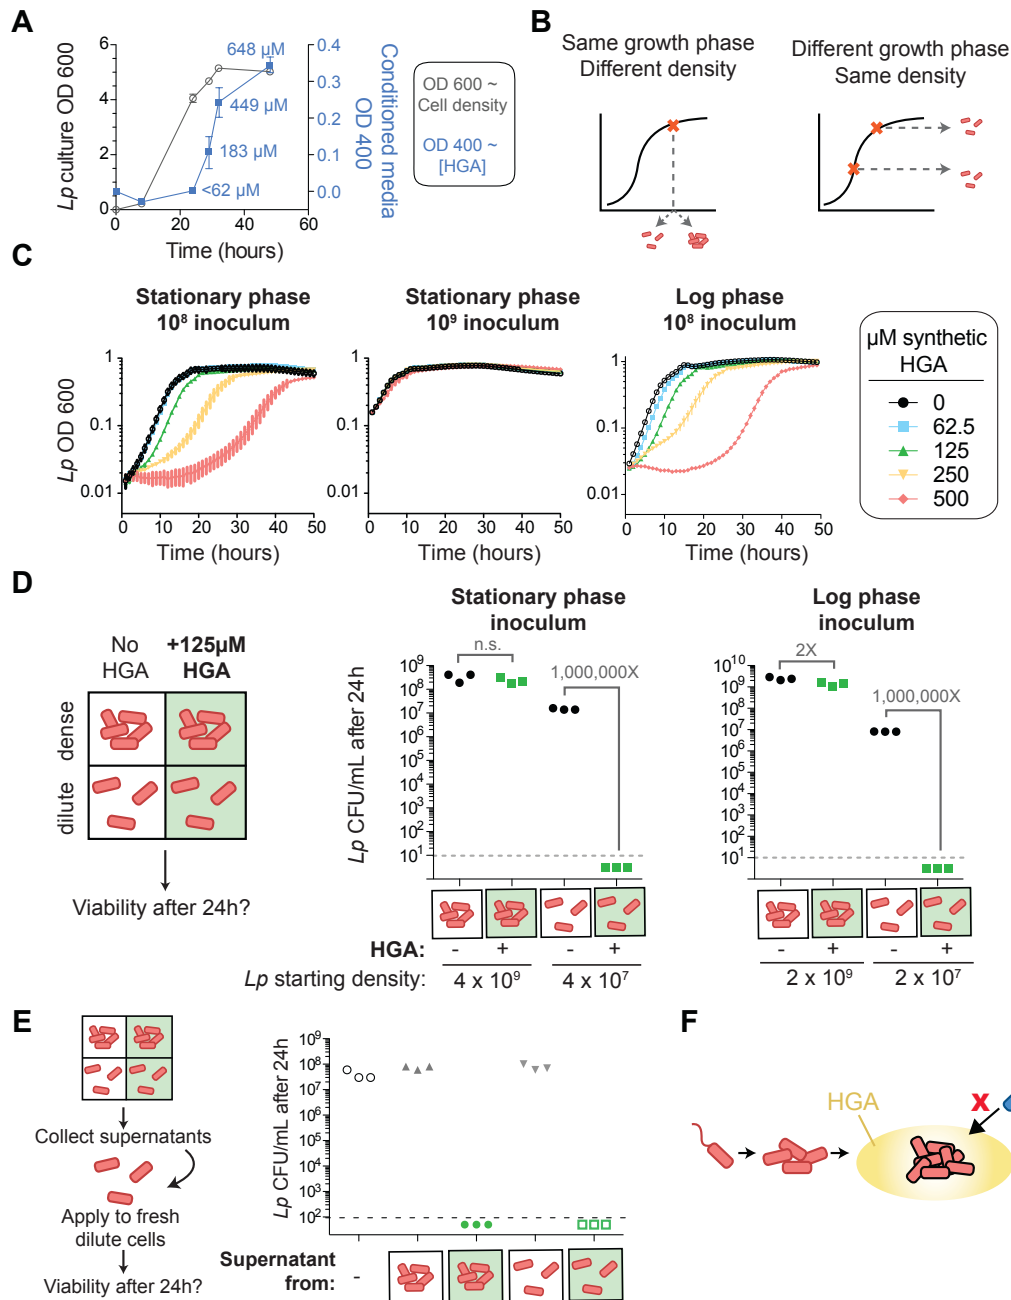

**Figure 6:** HGA susceptibility in *Lp* is linked to cell density, independent of inoculum growth phase. **A)** Timing of HGA secretion by *Lp* in rich media, measured by OD400 of conditioned media (CM) after allowing for full oxidation (blue boxes, right y-axis). A matched growth curve of *Lp* is presented for comparison (gray circles, left y-axis). Abundant HGA is secreted in during stationary phase. Estimates of secreted HGA concentration (blue) are based on a standard curve of synthetic HGA. Error bars show standard deviations. **B)** Schematic showing how experiments controlled for inoculum density vs. growth phase. To test the impact of cell density, a single culture was diluted to multiple densities at the start of the experiment. To test the impact of growth phase, *Lp* was sampled at multiple stages of growth and diluted to the same CFU/mL at the start of the experiment. **C)** *Lp* growth is inhibited by HGA when cells are inoculated at relatively low density ( $10^8$  CFU/mL), but HGA is ineffective in inhibiting growth when cells are inoculated at high density ( $10^9$  CFU/mL). Growth phase of *Lp* inoculum has little impact on HGA susceptibility. **D)** Viable CFUs following 24h incubation of *Lp* with or without 125 $\mu$ M HGA in nutrient-free PBS. When incubated at high density, bacteria are mostly resistant to HGA, while they are highly sensitive at lower density. Dotted line shows limit of detection. Brackets indicate the fold change in viable CFUs due to HGA exposure. **E)** High-density cells do not inactivate extracellular HGA. Supernatants from *Lp* +/- HGA at two densities were collected and applied to dilute cells for 24h. Viable CFUs were counted following supernatant exposure. HGA in all supernatants remained active against low density *Lp*. **F)** Model for HGA activity. *Lp* (orange) colonizes a surface and grows to form a microcolony. Once cells are at high density, they secrete abundant HGA (yellow). Through unknown mechanisms, high density *Lp* are resistant to HGA's effects (black outline), while low density *Lp* or other *Legionella* species (blue) are inhibited by HGA and cannot invade the microcolony's niche.

490 We reasoned that the quorum sensing pathway was most likely to control the  
491 substantial, density-dependent difference in HGA susceptibility. We therefore  
492 investigated if HGA resistance depended on the previously described *Lp* quorum  
493 sensing response regulator, *lqsR* (Tiaden et al. 2007). We found that deleting *lqsR* had  
494 no detectable impact on HGA susceptibility or resistance (Supplemental figure 7B).  
495 Therefore, the density-dependent susceptibility of *Lp* to HGA must be independent of  
496 the *lqsR* pathway.

497  
498 We next investigated the basis of high-density resistance to HGA by *Lp* bacteria.  
499 We considered the hypotheses that high-density cells could alter the activity of  
500 extracellular HGA, either through the secretion of inactivating compounds or through  
501 bulk, non-specific binding of HGA to bacterial biomass, leading to a reduction in its  
502 effective concentration. To test both hypotheses, we recovered the supernatants from  
503 high-density and low-density bacteria that had been incubated with or without HGA, and  
504 applied these supernatants to fresh, low-density *Lp* to test their HGA activity (Figure  
505 6E). We found that the supernatants from HGA-exposed *Lp* remained fully inhibitory,  
506 even after 24h incubation with high-density bacteria. Furthermore, we found that adding  
507 heat-killed *Lp* bacterial cells to low-density viable *Lp* bacteria did not enhance the  
508 latter's resistance to HGA inhibition (Supplemental Figure 7A). Therefore, we conclude  
509 that HGA susceptibility appears to be density-dependent and yet cell-intrinsic. Because  
510 *Lp* bacteria at high density both secrete and are protected from HGA, this strategy of  
511 secreting HGA only when *Lp* cells are conditionally HGA-resistant may allow *Lp* to  
512 produce a broadly active inhibitor while restricting the potential for self-harm.

513

514

## 515 Discussion

516 The HGA-melanin pathway is well-studied and widespread among bacteria and  
517 eukaryotes. In this study, we identify HGA as a mediator of inter-*Legionella* inhibition,  
518 both between *Legionella* species and even between genetically identical populations of  
519 *L. pneumophila*. To our knowledge, this is the first time that HGA has been described to  
520 have antimicrobial activity. One reason HGA-mediated inhibition may not have been

521 previously documented is that HGA is a redox-active, unstable molecule with transient  
522 activity. Our study finds that synthetic HGA can auto-oxidize over the course of an  
523 experiment to form inactive HGA-melanin (Figure 3, Supplemental Figure 4D), allowing  
524 exposed *Lp* populations to rebound following initial inhibition (Figure 4B). Intriguingly,  
525 although *Lp* populations recover upon HGA oxidation, *Lm* populations do not,  
526 suggesting that HGA may cause more harm to *Lm* cells. We find that the quenching of  
527 HGA's inhibitory activity occurs even more rapidly in the cysteine-rich microbial media  
528 typically used to grow *Legionella* in the lab (Supplemental Figure 4D). Conversely, we  
529 find that HGA becomes more potent in low-cysteine media or in PBS (Figures 3F, 6D),  
530 where oxidation of HGA into HGA-melanin occurs more slowly; such nutrient-poor  
531 conditions may better replicate the nutrient-poor (oligotrophic) aquatic environments of  
532 *Legionella*'s natural habitat (Atlas 1999; Boamah et al. 2017).

533

534         Although dense, stationary-phase cultures of *L. pneumophila* secrete abundant  
535 HGA (Figure 6A, Supplemental Figure 2D), we also find that these bacteria do not  
536 possess heritable resistance to HGA (Figure 4B-D) and are highly susceptible to HGA  
537 inhibition at low cell density. However, they exhibit conditional, density-dependent, cell  
538 intrinsic resistance to HGA at high cell density (Figure 6). This lack of heritable  
539 resistance makes HGA-mediated inhibition different from classical antibiotics or toxins,  
540 which typically are produced by bacteria that also express resistance genes or  
541 antitoxins. HGA inhibition is also distinct from that caused by toxic metabolic by-  
542 products in two important ways. First, HGA production is not required for efficient growth  
543 or metabolism in *Legionella* species (Supplemental Figure 2D, and see growth of  
544 *hisC2::Tn* mutant in Figure 4A). Second, high-density populations of *L. pneumophila*  
545 that produce HGA are themselves protected from by HGA inhibition (Figure 6). Only  
546 neighboring, low-density *Legionella* are strongly inhibited (Figure 4A, 6D). The strong  
547 density-dependence of *Legionella*'s susceptibility to HGA may be another reason that it  
548 has been previously undiscovered despite intense study of these bacteria.

549

550         HGA-mediated inhibition of *Legionella* is reminiscent of the antimicrobial activities  
551 of phenazines, another class of small aromatic molecules such as pyocyanin from

552 *Pseudomonas aeruginosa*. Both types of molecules are redox-active (Hassan and  
553 Fridovich 1980), are produced at high cell density (Hassan and Fridovich 1980; Baron,  
554 Terranova, and Rowe 1989), are able to chemically react with thiol groups (Cheluvappa  
555 et al. 2008; Heine et al. 2016), and result in the production of a colored pigment (Price-  
556 Whelan, Dietrich, and Newman 2006). Phenazine inhibitory activity typically comes from  
557 redox cycling and the production of reactive oxygen species, including H<sub>2</sub>O<sub>2</sub> (Hassan  
558 and Fridovich 1980; Cheluvappa et al. 2008). Oddly, HGA-melanin production has  
559 previously been implicated both in the production of (Noorian et al. 2017) and protection  
560 from (Keith et al. 2007; Orlandi et al. 2015) reactive oxygen species. The catalase  
561 experiments presented here have ruled out the production of extracellular H<sub>2</sub>O<sub>2</sub> as a  
562 possible mechanism explaining HGA inhibition (Supplemental Figure 3B-C). Instead,  
563 based on association of *lpg1681* and *DsbD2* with reduced HGA sensitivity (Figure 5),  
564 the ability of diverse thiols to quench HGA's activity (Supplemental Figure 3E), and  
565 precedents from phenazines (Heine et al. 2016), we propose that HGA (and/or its  
566 transient, oxidative intermediates) may be toxic by forming adducts on cysteine residues  
567 or otherwise disrupting disulfide bonding. Alternatively, HGA inhibition could occur via  
568 the production of other reactive oxygen species, including potentially the generation of  
569 intracellular superoxide and/or H<sub>2</sub>O<sub>2</sub> (Hassan and Fridovich 1979), which would not be  
570 affected by catalase treatment. As both of these mechanisms should be inhibitory to a  
571 number of bacterial taxa, it will be interesting to broadly survey HGA susceptibility  
572 outside of *Legionella*.

573

574 The density-dependence of *Lp*'s resistance to HGA is unusual and worthy of  
575 future study. Because high-density cells do not inactivate or bind up extracellular HGA  
576 (Figure 6E) and because heat-killed cells cannot protect live, low-density *Lp* from  
577 inhibition (Supplemental Figure 7A), we infer that resistance is cell-intrinsic, resulting  
578 from differing physiology and/or gene expression between high- and low-density cells.  
579 Two pathways that commonly regulate such defenses include the stringent response  
580 pathway, which becomes active under nutrient limitation and stress, and quorum  
581 sensing pathways, which become active at high cell density (Bachman and Swanson  
582 2001; Hammer, Tateda, and Swanson 2002; Dalebroux, Edwards, and Swanson 2009;

583 Hochstrasser and Hilbi 2017). Although our experiments disrupting these pathways  
584 suggest that neither pathway contributes to density-dependent susceptibility or  
585 resistance (Supplemental Figure 7B-D), we note that quorum sensing in *Legionella*  
586 remains understudied, and such pathways vary considerably across bacterial taxa  
587 (Hochstrasser and Hilbi 2017; Miller and Bassler 2001). Future work using unbiased  
588 approaches to investigate the regulation of HGA susceptibility may be able to uncover  
589 additional density-sensing pathways, possibly including an undescribed mode of  
590 quorum sensing in *Legionella*.

591 |  
592 *L. pneumophila* is often co-isolated with other *Legionella* species, which likely  
593 compete for similar ecological niches (Wery et al. 2008; Pereira et al. 2017). HGA-  
594 mediated inter-*Legionella* inhibition therefore has a strong potential to impact the  
595 success of *Lp* in both natural and manmade environments. Because high-density,  
596 established *Lp* bacterial communities are largely resistant to HGA inhibition, these  
597 communities might use HGA to protect against low-density, invading *Legionella*  
598 competitors with little harm to themselves (Figure 6F). In this model, motile *Lp* can  
599 disperse, colonize a new surface, and grow into a microcolony using the locally  
600 available nutrients. In these early stages, no HGA is produced. After the *Lp* population  
601 grows up and crosses a certain cell density threshold, the cells become HGA-resistant  
602 through a cell-intrinsic mechanism. When this dense population enters stationary phase,  
603 it also begins to secrete abundant HGA into the local environment. This secreted HGA  
604 has minimal impact on the resistant, producer cells. However, it can inhibit the growth of  
605 nearby, low-density *Legionella*, whether the neighboring cells are other *Legionella*  
606 species or even genetically-identical *Lp*. Given these dynamics observed in the lab, we  
607 speculate that HGA and other such inhibitors may be deployed as a bacterial niche-  
608 protective strategy.

609

## 610 **Materials and Methods**

611

612 **Bacterial strains and growth conditions** The bacterial strains and plasmids used for  
613 this study are listed in Supplemental Table 2. As our wild type *Legionella pneumophila*



614 (*Lp*) strain, we used KS79, which was derived from JR32 and ultimately from isolate  
615 Philadelphia-1 (de Felipe et al. 2008; Sadosky, Wiater, and Shuman 1993; Rao,  
616 Benhabib, and Ensminger 2013). Compared to JR32, the KS79 strain has a *comR*  
617 deletion to enable genetic manipulation (de Felipe et al. 2008). We used *Legionella*  
618 *micdadei* (*Lm*) tatlock as our susceptible strain (Garrity, Brown, and Vickers 1980;  
619 Hébert, Steigerwalt, and Brenner 1980). Liquid cultures of *Legionella* were grown  
620 shaking in AYE rich liquid media at 37°C (De Jesús, O'Connor, and Isberg 2013).  
621 Unless otherwise indicated, experiments were inoculated with stationary phase  
622 *Legionella*, grown from a single colony in AYE for 16-18 hours as described, to a  
623 density of 3 - 4 x 10<sup>9</sup> CFU/mL. For experiments with log phase *Lp*, an overnight culture  
624 was diluted into fresh AYE at 1:8 ratio (to a density of 4 - 5 x 10<sup>8</sup> CFU/mL) and allowed  
625 to grow to a density of 10<sup>9</sup> CFU/mL before setting up the experiment.

626

627 To manipulate the redox state of AYE, we altered the amount of cysteine added to the  
628 media from 0.4 g/L in standard AYE to 0.1, 0.2, and 0.8 g/L. On solid media, *Legionella*  
629 were grown either on BCYE agar plates either containing the standard cysteine  
630 concentration (0.4g/L) or in “low cysteine” conditions (0.05g/L) (Feeley et al. 1979;  
631 Solomon and Isberg 2000). *E. coli* strains used for cloning were grown in LB media.  
632 Where indicated, antibiotics were used at the following concentrations in solid and liquid  
633 media, respectively; chloramphenicol (5 µg/mL and 2.5 µg/mL), kanamycin (40 µg/mL)  
634 and ampicillin (50 µg/mL and 25 µg/mL). For counter-selection steps while generating  
635 deletion strains, 5% sucrose was added to BCYE plates. For agar overlay experiments,  
636 we used 0.7% agar dissolved in water, which was kept liquid at 50°C before pouring  
637 over low cysteine BCYE plates.

638

639 **Gene deletions and complementations** Genomic knockouts in *L. pneumophila* were  
640 generated as previously described (Wiater, Sadosky, and Shuman 1994). Briefly, we  
641 used an allelic exchange plasmid (pLAW344) harboring chloramphenicol and ampicillin  
642 selection cassettes and the counter-selection marker SacB, which confers sensitivity to  
643 sucrose. Into this plasmid, we cloned ~1kb regions upstream and downstream of the  
644 gene of interest to enable homologous recombination. Following electroporation and

645 selection on chloramphenicol, we used colony PCR to verify insertion of the plasmid into  
646 the chromosome, before counter-selection on sucrose media. From the resulting  
647 colonies, we performed PCR and Sanger sequencing to verify clean gene deletion. For  
648 complementation, the coding region of a candidate gene was cloned into a plasmid  
649 (pMMB207c) following a ptac promoter (J. Chen et al. 2004). To induce gene  
650 expression, strains carrying pMMB207c-derived plasmids were exposed to 1mM IPTG.  
651 All constructs were assembled using Gibson cloning (NEB Catalog #E2621).

652  
653 **Inhibition assays on agar plates** To visualize inhibition between neighboring  
654 *Legionella* on solid media, a streak of approximately  $5 \times 10^6$  CFU of the inhibitory  
655 strain of *Lp* was plated across the center of a low cysteine BCYE plate. After 3 days  
656 growth at 37°C, dilutions of susceptible *Lp* or *Lm* were plated as 10 $\mu$ L spots  
657 approximately 1 cm and >2 cm from the central line. Once spots were dry, plates were  
658 then incubated for an additional 3 days before scoring for inhibition. This assay was also  
659 used to quantify the bactericidal inhibition of *Lm*, with slight modifications. Here, all *Lm*  
660 was plated in 20 $\mu$ L spots at  $10^6$  CFU/mL. The time of plating susceptible *Lm* was  
661 treated as t=0. Once spots were dry, plugs were extracted from within the *Lm* spots  
662 using the narrow end of a Pasteur pipette. These plugs were transferred into media,  
663 vortexed, and plated to quantify CFU. This procedure was repeated after 48h at 37°C to  
664 compare *Lm* viability and growth within (“near”, Figure 1B-C) or outside (“far”) of the  
665 zone of inhibition.

666  
667 For inhibition assays on bacterial lawns, we plated 10 $\mu$ L drops of either live *Lp* or  
668 chemical compounds on top of a lawn of  $5 \times 10^7$  CFU *Lm* on low cysteine BCYE, and  
669 assessed growth of the lawn after 3 days at 37°C. Synthetic HGA (Sigma: #H0751) was  
670 dissolved in water at a concentration of 100 mM and filter sterilized before use. To limit  
671 the potential for HGA oxidation prior to use, 100mM aliquots prepared in water were  
672 stored frozen at -20C and discarded after 1-2 weeks. HGA-related compounds, 2-  
673 hydroxyphenylacetic acid (Sigma: #H49804) and 3-hydroxyphenylacetic acid (Sigma:  
674 #H49901), were prepared in the same way. To test the impact of DTT (Sigma: #43819)  
675 and glutathione (oxidized: Sigma #G4376 , reduced: Sigma #G6529) on HGA-mediated

676 inhibition, filter-sterilized solutions dissolved in water were mixed in equimolar ratios  
677 with HGA, and incubated shaking at room temperature for 1 hour before spotting onto  
678 bacterial lawns. HGA-melanin pigment was prepared from *Lp* conditioned media as  
679 previously described (Zheng et al. 2013) from KS79, the unpigmented *hisC2::Tn*  
680 mutant, and the hyperpigmented  $\Delta hmgA$  mutant. Briefly, conditioned media was  
681 collected and sterile filtered from 100 mL cultures of *Lp* in AYE media grown shaking at  
682 37°C for 3 days. The conditioned media was acidified to a pH of 1.5 and transferred to  
683 4°C for 2 hours to precipitate. Precipitated pigment was collected by centrifugation at  
684 4000 x g for 15 minutes and then washed with 10 mM HCl. Pelleted pigment was then  
685 returned to neutral pH and resuspended in PBS at 10X before testing.

686  
687 **Transposon mutagenesis screen** For random transposon insertion mutagenesis, we  
688 used a Mariner transposon from the pTO100 plasmid (O'Connor et al. 2011). We  
689 electroporated this plasmid into the KS79 strain and allowed cells to recover at 37°C for  
690 5 hours. To select for cells with integrated transposons, cultures were plated on  
691 BCYE/Kan/sucrose plates and incubated at 37°C for 3 days before screening individual  
692 mutant colonies.

693  
694 To identify transposon mutants with defects in *Lm* inhibition, we transferred each  
695 *Lp* mutant onto a low cysteine plate with a lawn of  $5 \times 10^7$  CFU *Lm* and visually  
696 screened for those with either small zones of inhibition or no zone of inhibition. This  
697 transfer of *Lp* mutants was achieved either by replica plating using sterile Whatman  
698 paper (Whatman: #1001150) or by manual transfer with a sterile toothpick. Plates were  
699 then incubated at 37°C for 3 days and scored. All putative mutants underwent clonal re-  
700 isolation, were diluted to OD 600 of 0.1, and spotted on fresh *Lm* lawns to retest their  
701 phenotypes. To map the sites of transposon integration, we used arbitrary PCR as  
702 described in (T. Chen et al. 1999), with primers redesigned to work with the pTO100  
703 transposon (Table 3). Briefly, this protocol involved two PCR steps to amplify the DNA  
704 flanking the transposon. The first step used low annealing temperatures to allow the  
705 arb1 randomized primer to bind many sites in the flanking DNA while the pTO100\_F or  
706 pTO100\_R primer annealed within the transposon, generating multiple products that

707 overlapped the flanking DNA. These products were amplified in the second step PCR  
708 using the arb2 and pTO100\_Rd2 primers, and we used the pTO100\_Rd2 primer for  
709 Sanger sequencing. PCR programs and conditions were as in (T. Chen et al. 1999).  
710

711 **HGA inhibition assays in AYE rich media** For rich media assays (e.g. Figures 3C-F,  
712 4B, 4D), overnight cultures of *Legionella* were diluted to  $10^8$  CFU/mL in AYE, mixed  
713 with synthetic HGA (at 0, 62.5, 125, 250, or 500 $\mu$ M final) or with isolated pigment in 96  
714 well plates, and grown shaking at 425 cpm at 37°C. The cytation 3 imaging reader  
715 (BioTek™ CYT3MV) was used to monitor growth by OD 600 measurements. Because  
716 oxidized pigment from synthetic HGA is detected at OD 600 as well, each experiment  
717 included bacteria-free control wells containing media and each concentration of HGA.  
718 To correct OD 600 readings for pigment development, at each time point we subtracted  
719 the control well reading from bacterial wells that received the same concentration of  
720 synthetic HGA.

721

722 For experiments with HGA “pre-oxidation” (Figure 3D), we diluted HGA in AYE  
723 media and incubated this solution shaking at 37°C for 24 hours in the plate reader  
724 before adding *Lm* bacteria. Complete oxidation of HGA during the 24 hours was  
725 monitored using OD400 to track the accumulation of HGA-melanin pigment  
726 (Supplemental figure 4). To test if extracellular catalase could protect from HGA  
727 inhibition (Supplemental figure 3B), we incubated *Lm* at  $10^7$  CFU/mL with or without  
728 125 $\mu$ M HGA and either 0, 1, 10, or 100 U/mL of bovine catalase (Sigma #C30). As a  
729 control to ensure that the catalase was active, we incubated the bacteria as above with  
730 catalase and 2mM H<sub>2</sub>O<sub>2</sub> (Sigma #88597).

731

732 In *Lp*, HGA inhibition in AYE rich media resulted in a growth delay, similar to an  
733 extended lag phase (Figure 4B). To determine if this delay was due to genetic  
734 adaptation, we sampled *Lp* after 70 hours growth with 250  $\mu$ M HGA or without HGA  
735 (Figure 4C-D). These bacteria were washed once and resuspended in fresh AYE,  
736 before being diluted back to  $10^8$  CFU/mL and then exposed to fresh, synthetic HGA as  
737 above. To assess the correlation between HGA oxidation and the length of the *Lp*

738 growth delay (Figure 4E), we pooled data from 8 experiments on different days that  
739 measured wild type *Lp* (KS79) exposed to a range of HGA concentrations in AYE. We  
740 considered the “Time to HGA saturation” as the length of time required for a given  
741 concentration of HGA to stop forming additional HGA-melanin, measured as the time  
742 until OD400 readings increased by less than or equal to 0.001 units per hour. The “Time  
743 to mid-log” was measured as the time when *Lp* exposed to that concentration of HGA  
744 had grown to an OD600 of 0.1. To compare sensitivity to HGA among *Lp* strains, we  
745 calculated the lag phase from the growth curve of each well using the GrowthRates  
746 program (Hall et al. 2014). We excluded a small number of samples where the growth  
747 curve was not well fit ( $R < 0.99$ ), and then for each strain used the difference in lag time  
748 between the samples with and without HGA to calculate the growth delay due to HGA  
749 (Figures 5C).

750  
751 **HGA inhibition assays in PBS** While we were able to manipulate inoculum growth  
752 phase and cell density in the AYE assays, during these experiments the bacteria altered  
753 their density and growth phase as they grew in rich media. To separate the impacts of  
754 cell density and growth phase on HGA susceptibility, we used a complementary assay  
755 in which we evaluated *Legionella* viability when exposed to HGA in nutrient-free PBS at  
756 different cell densities. This design ensured that the bacteria maintained a constant cell  
757 density throughout the course of the experiment. Stationary phase cultures were  
758 washed once and re-suspended in PBS. We diluted these bacteria to estimated starting  
759 concentrations of  $10^9$ ,  $10^8$ , and  $10^7$  CFU/mL and plated for CFU at  $t=0$ . We  
760 distributed the remaining bacteria into 96 well plates with or without 125  $\mu$ M HGA.  
761 Plates were incubated shaking in a plate reader at 425 cpm at 37°C for 24 hours before  
762 plating to quantify CFU on BCYE plates. CFU were counted after 3-4 days growth at  
763 37°C.

764  
765 To determine if high density bacteria were protected via mass action effects that  
766 diluted out the amount of HGA per cell through binding of bulk material, we asked if the  
767 addition of dense, heat-killed bacteria could protect low-density *Lp* from HGA  
768 (Supplemental figure 7A). To prepare high-density heat-killed bacteria, an overnight

769 culture of *Lp* was washed once in PBS, resuspended to  $2 \times 10^9$  CFU/mL, and  
770 incubated at 100-110 °C for 60 minutes. After heating, this sample was diluted 1:2 and  
771 mixed with  $10^7$  CFU/mL live *Lp* in PBS +/- 125µM HGA to assess protection. As a  
772 control,  $10^9$  and  $10^7$  CFU/mL live *Lp* with or without HGA were tested simultaneously.  
773 Cells were incubated and plated as above to assess viability. To determine if high  
774 density bacteria were protected via HGA degradation, we tested if the supernatants  
775 from HGA-exposed, high-density bacteria retained the potency to inhibit low-density  
776 bacteria (Figure 6E). To generate supernatants, we set up 2mL samples containing  
777  $10^8$  or  $10^7$  CFU/mL of *Lp* in PBS +/- 125µM HGA and incubated them shaking at  
778 37°C for 20 hours. After plating aliquots for viable CFU, we pelleted the remaining  
779 bacteria and sterile filtered 1mL of each supernatant through a 0.2µm filter. Each  
780 supernatant was tested in triplicate, incubated with fresh *Lp* at  $10^7$  CFU/mL in a 96  
781 well plate as above for 24 hours before plating for CFU. As a control,  $10^7$  CFU/mL live  
782 *Lp* were incubated in PBS alone.

783

784 **Quantification of HGA's ability to react with cysteine** HGA is known to be a redox-  
785 active molecule, with a redox potential of +0.636V (Eslami, Namazian, and Zare 2013).  
786 As this measurement can be altered by pH and temperature, we assessed the ability for  
787 HGA to oxidize cysteine in our experimental conditions using Ellman's reagent (also  
788 known as 5,5'-dithiobis-(2-nitrobenzoic acid), DTNB, Invitrogen #D8451). Ellman's  
789 reagent reacts in the presence of reduced thiol groups on L-cysteine to form a yellow  
790 color, which can be read as 412nm absorbance. When thiol groups are oxidized, the  
791 Ellman's reagent is colorless. We used the ability for HGA to decrease the amount of  
792 reduced cysteine as a proxy for its oxidizing ability. Stock solutions of both 100mM HGA  
793 and 1.5mM L-cysteine (Sigma #C6852) were prepared fresh in PBS at the start of the  
794 experiment. Different concentrations of HGA (from 125µM to 8mM) were incubated in  
795 triplicate, shaking at 25°C with 1.5mM cysteine in PBS for 16 hours. These conditions  
796 were compared to a standard curve of cysteine from 0-2mM, which were incubated in  
797 parallel with the experimental samples to account for cysteine oxidation over time. To  
798 quantify the remaining free thiol groups, 180uL of 0.08 mg/mL Ellman's reagent was  
799 mixed with 17.65uL of each experimental or standard sample in a 96 well plate,

800 incubated for 3 hours at 25°C, and read for 412nm absorbance. The “decrease in  
801 reduced cysteine” was calculated as the difference between the initial and final  
802 measured cysteine concentrations, based on the standard curve conversion.

803  
804 **Estimation of amount of HGA secreted by *Lp*** HGA-melanin is a black-brown pigment  
805 that is easily detected at OD 400. We took advantage of this coloration to estimate the  
806 amount of HGA that had been secreted by *Lp* by comparing the color of conditioned  
807 media to a standard curve of oxidized synthetic HGA. To isolate conditioned media from  
808 pigment mutant strains, cultures of KS79,  $\Delta hmgA$ , and HisC::Tn were inoculated with  
809 fresh colonies from a BCYE plate into 5 mL AYE and were grown shaking at 37°C for 48  
810 hours. We then collected conditioned media by pelleting the bacteria and passing the  
811 supernatant through a 0.2µm filter. To harvest conditioned media for a time course,  
812 cultures of *Lp* were inoculated into 5 ml AYE and grown shaking at 37°C. After 15, 20,  
813 24, 39, 44, and 48 hours, we measured the OD 600 of the culture and collected  
814 conditioned media. To create a standard curve, we diluted synthetic HGA into AYE at  
815 the following concentrations: 62.5 µM, 125 µM, 250 µM, 500 µM, and 1 mM. The  
816 conditioned media and standard curve samples were incubated in a 96 well plate in a  
817 plate reader shaking at 37°C for 24 hours to allow the HGA to oxidize. We used OD 400  
818 data from the 24 hour time point to generate a standard curve for each HGA  
819 concentration and calculated a line of best fit using linear regression. This equation was  
820 used to estimate the amount of secreted HGA that corresponded to the OD 400 of each  
821 conditioned media sample. (Supplemental Figure 4).

822  
823 **HGA-resistant mutants** Because the inhibitory activity of HGA is quenched through  
824 interactions with cysteine in rich media (e.g. Figure 3F), it was not possible to select for  
825 HGA-resistant mutants by mixing HGA into BCYE agar. Instead, to reduce the potential  
826 for HGA to react with media components while allowing sufficient access to nutrients for  
827 mutant cells to grow, we selected for HGA-resistant mutants by mixing  $4 \times 10^7$  CFU  
828 *Legionella* with 1mM HGA in 4mL of 0.7% molten agar and pouring this solution as an  
829 overlay on a low cysteine BCYE plate. Plates were incubated at 37°C for 6 days, before  
830 candidate resistant colonies were picked and clonally isolated. The HGA resistance and

831 growth of each isolate was re-tested on overlays with or without 1mM HGA on both  
832 regular and low cysteine BCYE.

833

834         Twenty-nine isolates were more resistant to HGA than wild type *Lp* upon  
835 retesting. We sequenced and analyzed genomic DNA from these isolates and a  
836 matched wild type strain as follows. DNA was prepared from each strain using a  
837 Purelink genomic DNA mini kit (Invitrogen, #K1820). DNA concentrations were  
838 quantified using Qubit and normalized to 0.5 ng/uL. Barcoded libraries were prepared  
839 using tagmentation according to Baym et al. 2015 (Baym et al. 2015), analyzed with  
840 QuantIT DNA quantification, pooled, and sequenced with 50 bp paired-end reads on an  
841 Illumina HiSeq 2500 machine. Reads were trimmed for quality and to remove Nextera  
842 indices with Trimmomatic (Bolger, Lohse, and Usadel 2014) and mapped to the  
843 Philadelphia-1 genome (Chien et al. 2004) using Bowtie2 with default parameters  
844 (Langmead et al. 2009). Coverage plots were generated for each strain using  
845 bamcoverage (Ramírez et al. 2016) and manually examined for evidence of large  
846 genomic deletions and amplifications. None were observed, apart from a prophage that  
847 was present in the reference genome but missing from all sequenced strains, including  
848 our wild type KS79 strain. Variants were detected for each mutant using Naive Variant  
849 Caller (Blankenberg D, et al. In preparation). Those variants that were detected in  
850 mutant strains but not the wild type strain were considered as putative causative  
851 mutations. For each of these mutations, we inspected the mapped reads and excluded  
852 faulty variant calls that either were adjacent to coverage gaps or that did not appear to  
853 be fixed in the clonal mutant and/or wild type sequences, likely due to errors in read  
854 mapping. After this manual filtering, 1-3 well-supported mutations remained for each  
855 mutant genome. Nine of the mutants were isolated on a different day from the other  
856 mutants: in addition to various unshared mutations, these nine strains each carried  
857 exactly the same missense mutation in *rplX*, which we disregarded as a background  
858 mutation that likely arose before selection. Following this exclusion, each mutant carried  
859 only a single well-supported mutation in a coding region. Most often this coding  
860 mutation was the only mutation we detected, although one mutant carried two additional  
861 intergenic point mutations. The coding mutations were point mutations or small



862 deletions that resulted in non-synonymous changes, frame shifts, or gene extensions.  
863 Across different mutants, the mutations we uncovered were repeatedly found in the  
864 same, few loci (Table 1).

865

866 **Evolution of *lpg1681*** The genes in the HGA-melanin synthesis pathway are highly  
867 conserved in diverse bacteria and across the *Legionella* genus, with all genes present in  
868 all 41 currently sequenced *Legionella spp.* genomes (Burstein et al. 2016). In contrast,  
869 we were able to identify *lpg1681* in only 30 *Legionella spp.* genomes, as well as a single  
870 draft genome outside the *Legionella* genus— *Piscirickettsia litoralis*, an intracellular fish  
871 pathogen (Wan et al. 2016). Across the *lpg1681*-containing genomes, there is evidence  
872 for extensive recombination of the flanking loci, yet *lpg1681* is always found upstream of  
873 *dsbD2*. We identified most of these homologs of *lpg1681* using a jackhmmr search  
874 (Finn et al. 2015), followed by cross-referencing the homologs with the *Legionella*  
875 orthology groups defined by Burstein et al., 2016. From this starting set, additional  
876 *lpg1681* orthologs were identified in unannotated, intergenic regions by searching for  
877 >200bp open reading frames upstream of *dsbD* orthologs, and confirming the homology  
878 of these regions using MAFFT alignments (Kato et al. 2002). Through this method, we  
879 located *lpg1681* in all currently sequenced *Legionella* genomes that contain an  
880 annotated *dsbD2* gene, with the exception of *L. shakespearei*. We categorized the  
881 *lpg1681*-containing loci into those with similar synteny, based on the orthology group  
882 annotations in Burstein et al. 2016. We colored and provided names for the neighboring  
883 genes in Supplemental figure 6 if they had a homolog in the *L. pneumophila*  
884 Philadelphia-1 genome that was not annotated as a hypothetical gene. To assess the  
885 conservation of the *lpg1680-lpg1682* among *L. pneumophila* strains, we used blastn in  
886 the NCBI nr and wgs databases with the full *lpg1680-lpg1682* genomic DNA sequence  
887 as a query. We found that the full region was conserved with few mutations across 501  
888 currently sequenced *L. pneumophila* strains.

## Acknowledgements

We thank Howard Shuman for providing *Legionella* strains as well as the pLAW344 and pMMB207c plasmids, and Tamara O'Connor for the pTO100 plasmid carrying the transposon. Thank you to Michelle Swanson for providing the stringent response pathway mutant and complementation strains. We thank Ben Ross, Julian Simon, Rasi Subramaniam, Howard Shuman, Pete Greenberg, Jim Imlay, and the three reviewers for useful discussion and suggestions. We also thank Michelle Hays, Kevin Forsberg, Alistair Russell, Janet Young, and Howard Shuman for providing feedback on the manuscript.

## References

- Abisado, Rhea G, Saida Benomar, Jennifer R Klaus, Ajai A Dandekar, and Josephine R Chandler. 2018. "Bacterial Quorum Sensing and Microbial Community Interactions.." *mBio* 9 (3). doi:10.1128/mBio.02331-17.
- Atlas, R. M. 1999. "Legionella: From Environmental Habitats to Disease Pathology, Detection and Control.." *Environmental Microbiology* 1 (4): 283–93.
- Bachman, M A, and M S Swanson. 2001. "RpoS Co-Operates with Other Factors to Induce Legionella Pneumophila Virulence in the Stationary Phase.." *Molecular Microbiology* 40 (5): 1201–14.
- Baron, Stephen, Grace Terranova, and John Rowe. 1989. "Molecular Mechanism of the Antimicrobial Action of Pyocyanin." *Current Microbiology* 18 (May): 223–30.
- Baym, Michael, Sergey Kryazhimskiy, Tami D Lieberman, Hattie Chung, Michael M Desai, and Roy Kishony. 2015. "Inexpensive Multiplexed Library Preparation for Megabase-Sized Genomes." Edited by Stefan J Green. *PLoS ONE* 10 (5): e0128036. doi:10.1371/journal.pone.0128036.s002.
- Berg, J D, J C Hoff, P V Roberts, and A Matin. 1985. "Growth of Legionella Pneumophila in Continuous Culture.." *Applied and Environmental Microbiology* 49 (6): 1534–37.
- Boamah, David K, Guangqi Zhou, Alexander W Ensminger, and Tamara J O'Connor. 2017. "From Many Hosts, One Accidental Pathogen: the Diverse Protozoan Hosts of Legionella." *Frontiers in Cellular and Infection Microbiology* 7 (November): 21660. doi:10.1007/s00436-012-3106-4.
- Bolger, Anthony M, Marc Lohse, and Bjoern Usadel. 2014. "Trimmomatic: a Flexible Trimmer for Illumina Sequence Data.." *Bioinformatics* 30 (15): 2114–20. doi:10.1093/bioinformatics/btu170.
- Burstein, David, Francisco Amaro, Tal Zusman, Ziv Lifshitz, Ofir Cohen, Jack A Gilbert, Tal Pupko, Howard A Shuman, and Gil Segal. 2016. "Genomic Analysis of 38 Legionella Species Identifies Large and Diverse Effector Repertoires." *Nature Genetics*, January. doi:10.1038/ng.3481.
- Chatfield, C H, and N P Cianciotto. 2007. "The Secreted Pyomelanin Pigment of Legionella Pneumophila Confers Ferric Reductase Activity." *Infection and Immunity* 75 (8): 4062–70. doi:10.1128/IAI.00489-07.
- Cheluvappa, Rajkumar, Ronald Shimmon, Michael Dawson, Sarah N Hilmer, and David G Le

- Couteur. 2008. "Reactions of *Pseudomonas Aeruginosa* Pyocyanin with Reduced Glutathione.." *Acta Biochimica Polonica* 55 (3): 571–80.
- Chen, John, Karim Suwwan de Felipe, Margaret Clarke, Hao Lu, O Roger Anderson, Gil Segal, and Howard A Shuman. 2004. "Legionella Effectors That Promote Nonlytic Release From Protozoa.." *Science (New York, NY)* 303 (5662): 1358–61. doi:10.1126/science.1094226.
- Chen, T, R Yong, H Dong, and M J Duncan. 1999. "A General Method for Direct Sequencing of Transposon Mutants by Randomly Primed PCR." *Technical Tips Online*.
- Chien, Minchen, Irina Morozova, Shundi Shi, Huitao Sheng, Jing Chen, Shawn M Gomez, Gifty Asamani, et al. 2004. "The Genomic Sequence of the Accidental Pathogen *Legionella Pneumophila*.." *Science (New York, NY)* 305 (5692): 1966–68. doi:10.1126/science.1099776.
- Dalebroux, Zachary D, Rachel L Edwards, and Michele S Swanson. 2009. "SpoT Governs *Legionella Pneumophila* Differentiation in Host Macrophages." *Molecular Microbiology* 71 (3): 640–58. doi:10.1111/j.1365-2958.2008.06555.x.
- Davey, M E, and G A O'toole. 2000. "Microbial Biofilms: From Ecology to Molecular Genetics.." *Microbiology and Molecular Biology Reviews* 64 (4): 847–67.
- de Felipe, Karim Suwwan, Robert T Glover, Xavier Charpentier, O Roger Anderson, Moraima Reyes, Christopher D Pericone, and Howard A Shuman. 2008. "Legionella Eukaryotic-Like Type IV Substrates Interfere with Organelle Trafficking." Edited by Ralph R Isberg. *PLoS Pathogens* 4 (8): e1000117. doi:10.1371/journal.ppat.1000117.s001.
- De Jesús, Dennise A, Tamara J O'Connor, and Ralph R Isberg. 2013. "Analysis of *Legionella* Infection Using RNAi in *Drosophila* Cells." In *Legionella: Methods and Protocols*, edited by Carmen Buchrieser and Hubert Hilbi, 251–64. *Legionella: Methods and Protocols*. Totowa, NJ: Humana Press.
- Declerck, Priscilla. 2010. "Biofilms: the Environmental Playground of *Legionella Pneumophila*." *Environmental Microbiology* 12 (3): 557–66. doi:10.1111/j.1462-2920.2009.02025.x.
- Declerck, Priscilla, Jonas Behets, Vincent van Hoef, and Frans Ollevier. 2007. "Detection of *Legionella* Spp. and Some of Their Amoeba Hosts in Floating Biofilms From Anthropogenic and Natural Aquatic Environments." *Water Research* 41 (14): 3159–67. doi:10.1016/j.watres.2007.04.011.
- Doerfel, Lili K, Ingo Wohlgemuth, Christina Kothe, Frank Peske, Henning Urlaub, and Marina V Rodnina. 2013. "EF-P Is Essential for Rapid Synthesis of Proteins Containing Consecutive Proline Residues.." *Science (New York, NY)* 339 (6115): 85–88. doi:10.1126/science.1229017.
- Eslami, Marzieh, Mansoor Namazian, and Hamid R Zare. 2013. "Electrooxidation of Homogentisic Acid in Aqueous and Mixed Solvent Solutions: Experimental and Theoretical Studies." *The Journal of Physical Chemistry B* 117 (9): 2757–63. doi:10.1021/jp3121325.
- Fang, G D, V L Yu, and R M Vickers. 1989. "Disease Due to the Legionellaceae (Other Than *Legionella Pneumophila*). Historical, Microbiological, Clinical, and Epidemiological Review.." *Medicine* 68 (2): 116–32.
- Feeley, J C, R J Gibson, G W Gorman, N C Langford, J K Rasheed, D C Mackel, and W B Baine. 1979. "Charcoal-Yeast Extract Agar: Primary Isolation Medium for *Legionella Pneumophila*.." *Journal of Clinical Microbiology* 10 (4): 437–41.
- Fields, B S, R F Benson, and R E Besser. 2002. "Legionella and Legionnaires' Disease: 25 Years of Investigation." *Clinical Microbiology Reviews* 15 (3): 506–26. doi:10.1128/CMR.15.3.506-526.2002.
- Finn, Robert D, Jody Clements, William Arndt, Benjamin L Miller, Travis J Wheeler, Fabian Schreiber, Alex Bateman, and Sean R Eddy. 2015. "HMMER Web Server: 2015 Update." *Nucleic Acids Research* 43 (W1): W30–W38. doi:10.1093/nar/gkt1180.
- Foster, Kevin R, and Thomas Bell. 2012. "Competition, Not Cooperation, Dominates Interactions Among Culturable Microbial Species." *Current Biology : CB* 22 (19). Elsevier

- Ltd: 1845–50. doi:10.1016/j.cub.2012.08.005.
- Fraser, D W, T R Tsai, W Orenstein, W E Parkin, H J Beecham, R G Sharrar, J Harris, et al. 1977. "Legionnaires' Disease: Description of an Epidemic of Pneumonia.." *New England Journal of Medicine* 297 (22): 1189–97. doi:10.1056/NEJM197712012972201.
- Garrity, G M, Adam Brown, and R M Vickers. 1980. "Tatlockia and Fluoribacter: Two New Genera of Organisms Resembling Legionella Pneumophila." *International Journal of Systematic Bacteriology* 30 (4): 609–14. doi:10.1099/00207713-30-4-609.
- Ghigo, Jean-Marc, and Olaya Rendueles. 2015. "Mechanisms of Competition in Biofilm Communities." In, 319–42. American Society of Microbiology. doi:10.1128/microbiolspec.MB-0009-2014.
- Gu, W, J Song, C A Bonner, G Xie, and R A Jensen. 1998. "PhhC Is an Essential Aminotransferase for Aromatic Amino Acid Catabolism in Pseudomonas Aeruginosa.." *Journal of General Microbiology* 144 ( Pt 11) (November): 3127–34. doi:10.1099/00221287-144-11-3127.
- Hall, B G, H Acar, A Nandipati, and M Barlow. 2014. "Growth Rates Made Easy." *Molecular Biology and Evolution* 31 (1): 232–38. doi:10.1093/molbev/mst187.
- Hammer, Brian K, Eiko S Tateda, and Michele S Swanson. 2002. "A Two-Component Regulator Induces the Transmission Phenotype of Stationary-Phase Legionella Pneumophila.." *Molecular Microbiology* 44 (1): 107–18.
- Hassan, H M, and I Fridovich. 1979. "Intracellular Production of Superoxide Radical and of Hydrogen Peroxide by Redox Active Compounds.." *Archives of Biochemistry and Biophysics* 196 (2): 385–95.
- Hassan, H M, and I Fridovich. 1980. "Mechanism of the Antibiotic Action Pyocyanine.." *Journal of Bacteriology* 141 (1): 156–63.
- Heine, D, S Sundaram, Matthias Beudert, K Martin, and C Hertweck. 2016. "A Widespread Bacterial Phenazine Forms S-Conjugates with Biogenic Thiols and Crosslinks Proteins.." *Chemical Science* 7 (8): 4848–55. doi:10.1039/c6sc00503a.
- Hébert, G Ann, Arnold G Steigerwalt, and Don J Brenner. 1980. "Legionella Micdadei Species Nova: Classification of a Third Species of Legionella Associated with Human Pneumonia." *Current Microbiology* 3 (5): 255–57. <https://link.springer.com/content/pdf/10.1007%2F02601800.pdf>.
- Hibbing, Michael E, Clay Fuqua, Matthew R Parsek, and S Brook Peterson. 2010. "Bacterial Competition: Surviving and Thriving in the Microbial Jungle.." *Nature Reviews Microbiology* 8 (1): 15–25. doi:10.1038/nrmicro2259.
- Hochstrasser, Ramon, and Hubert Hilbi. 2017. "Intra-Species and Inter-Kingdom Signaling of Legionella Pneumophila." *Frontiers in Microbiology* 8 (26261): 21660. doi:10.1111/j.1365-2958.2007.05604.x.
- Hoffmann, Christine, Christopher F Harrison, and Hubert Hilbi. 2014. "The Natural Alternative: Protozoa as Cellular Models for Legionella Infection.." *Cellular Microbiology* 16 (1): 15–26. doi:10.1111/cmi.12235.
- Imlay, James A. 2013. "The Molecular Mechanisms Andphysiological Consequences of Oxidativestress: Lessons From a Model Bacterium." *Nature Reviews Microbiology* 11 (7). Nature Publishing Group: 443–54. doi:10.1038/nrmicro3032.
- Inaba, K. 2009. "Disulfide Bond Formation System in Escherichia Coli." *Journal of Biochemistry* 146 (5): 591–97. doi:10.1074/jbc.M005957200.
- Isberg, Ralph R, Tamara J O'Connor, and Matthew Heidtman. 2008. "The Legionella Pneumophila Replication Vacuole: Making a Cosy Niche Inside Host Cells." *Nature Reviews Microbiology* 7 (1): 13–24. doi:10.4161/auto.5521.
- Johnston, Chad W, Jonathan Plumb, Xiang Li, Sergio Grinstein, and Nathan A Magarvey. 2016. "Synthetic and Systems Biotechnology." *Synthetic and Systems Biotechnology* 1 (2). Elsevier B.V.: 130–36. doi:10.1016/j.synbio.2015.12.001.

- Katoh, Kazutaka, Kazuharu Misawa, Kei-Ichi Kuma, and Takashi Miyata. 2002. "MAFFT: a Novel Method for Rapid Multiple Sequence Alignment Based on Fast Fourier Transform.." *Nucleic Acids Research* 30 (14): 3059–66.
- Keith, K E, L Killip, P He, G R Moran, and M A Valvano. 2007. "Burkholderia Cenocepacia C5424 Produces a Pigment with Antioxidant Properties Using a Homogentisate Intermediate." *Journal of Bacteriology* 189 (24): 9057–65. doi:10.1128/JB.00436-07.
- Kim, B R, J E Anderson, S A Mueller, W A Gaines, and A M Kendall. 2002. "Literature Review-- Efficacy of Various Disinfectants Against Legionella in Water Systems.." *Water Research* 36 (18): 4433–44.
- Kotob, S I, S L Coon, E J Quintero, and R M Weiner. 1995. "Homogentisic Acid Is the Primary Precursor of Melanin Synthesis in Vibrio Cholerae, a Hyphomonas Strain, and Shewanella Colwelliana.." *Applied and Environmental Microbiology* 61 (4): 1620–22.
- Kpadeh, Zegbeh Z, Shandra R Day, Brandy W Mills, and Paul S Hoffman. 2015. "Legionella Pneumophila Utilizes a Single-Player Disulfide-Bond Oxidoreductase System to Manage Disulfide Bond Formation and Isomerization.." *Molecular Microbiology* 95 (6): 1054–69. doi:10.1111/mmi.12914.
- Langmead, Ben, Cole Trapnell, Mihai Pop, and Steven L Salzberg. 2009. "Ultrafast and Memory-Efficient Alignment of Short DNA Sequences to the Human Genome." *Genome Biology* 10 (3): R25. doi:10.1186/gb-2009-10-3-r25.
- Lau, H Y, and N J Ashbolt. 2009. "The Role of Biofilms and Protozoa in Legionella Pathogenesis: Implications for Drinking Water.." *Journal of Applied Microbiology* 107 (2): 368–78. doi:10.1111/j.1365-2672.2009.04208.x.
- Li, Laam, Nilmini Mendis, Hana Trigui, and Sebastien P Faucher. 2015. "Transcriptomic Changes of Legionella Pneumophila in Water." *BMC Genomics*, August. BMC Genomics, 1–21. doi:10.1186/s12864-015-1869-6.
- Lin, Yusen E, Janet E Stout, and Victor L Yu. 2011. "Prevention of Hospital-Acquired Legionellosis." *Current Opinion in Infectious Diseases* 24 (4): 350–56. doi:10.1097/QCO.0b013e3283486c6e.
- Liu, George Y, and Victor Nizet. 2009. "Color Me Bad: Microbial Pigments as Virulence Factors." *Trends in Microbiology* 17 (9): 406–13. doi:10.1016/j.tim.2009.06.006.
- Marman, Hannah E, Alexandra R Mey, and Shelley M Payne. 2014. "Elongation Factor P and Modifying Enzyme PoxA Are Necessary for Virulence of Shigella Flexneri.." *Infection and Immunity* 82 (9): 3612–21. doi:10.1128/IAI.01532-13.
- McDade, J E, C C Shepard, D W Fraser, T R Tsai, M A Redus, and W R Dowdle. 1977. "Legionnaires' Disease: Isolation of a Bacterium and Demonstration of Its Role in Other Respiratory Disease.." *New England Journal of Medicine* 297 (22): 1197–1203. doi:10.1056/NEJM197712012972202.
- Mendis, Nilmini, Peter McBride, and Sebastien P Faucher. 2015. "Short-Term and Long-Term Survival and Virulence of Legionella Pneumophila in the Defined Freshwater Medium Fraquil." Edited by Zhao-Qing Luo. *PLoS ONE* 10 (9): e0139277. doi:10.1371/journal.pone.0139277.t001.
- Miller, M B, and B L Bassler. 2001. "Quorum Sensing in Bacteria.." *Annual Review of Microbiology* 55: 165–99. doi:10.1146/annurev.micro.55.1.165.
- Molofsky, Ari B, and Michele S Swanson. 2004. "Differentiate to Thrive: Lessons From the Legionella Pneumophila Life Cycle." *Molecular Microbiology* 53 (1): 29–40. doi:10.1128/jb.179.14.4639-4642.1997.
- Nadell, Carey D, Knut Drescher, and Kevin R Foster. 2016. "Spatial Structure, Cooperation and Competition in Biofilms." *Nature Reviews Microbiology* 14 (9). Nature Publishing Group: 589–600. doi:10.1038/nrmicro.2016.84.
- Nam, Daesil, Eunna Choi, Dongwoo Shin, and Eun-Jin Lee. 2016. "tRNA Pro-Mediated Downregulation of Elongation Factor P Is Required for mgtCBRExpression During

- Salmonellainfection." *Molecular Microbiology* 102 (2): 221–32. doi:10.4161/viru.2.2.15039.
- Navarre, William Wiley, S Betty Zou, Hervé Roy, Jinglin Lucy Xie, Alexei Savchenko, Alexander Singer, Elena Edvokimova, et al. 2010. "PoxA, YjeK, and Elongation Factor P Coordinately Modulate Virulence and Drug Resistance in Salmonella Enterica." *Molecular Cell* 39 (2). Elsevier Ltd: 209–21. doi:10.1016/j.molcel.2010.06.021.
- Noorian, Parisa, Jie Hu, Zhiliang Chen, Staffan Kjelleberg, Marc R Wilkins, Shuyang Sun, and Diane McDougald. 2017. "Pyomelanin Produced by Vibrio Cholerae Confers Resistance to Predation by Acanthamoeba Castellanii.." *FEMS Microbiology Ecology* 93 (12). doi:10.1093/femsec/fix147.
- Nosanchuk, Joshua D, and Arturo Casadevall. 2003. "The Contribution of Melanin to Microbial Pathogenesis.." *Cellular Microbiology* 5 (4): 203–23.
- O'Connor, T J, Y Adepoju, D Boyd, and Ralph R Isberg. 2011. "Minimization of the Legionella Pneumophila Genome Reveals Chromosomal Regions Involved in Host Range Expansion." *Proceedings of the ...* doi:10.1073/pnas.1115233108.
- Oliva, Giulia, Tobias Sahr, and Carmen Buchrieser. 2018. "The Life Cycle of L. Pneumophila: Cellular Differentiation Is Linked to Virulence and Metabolism." *Frontiers in Cellular and Infection Microbiology* 8 (January): 382. doi:10.1128/JB.184.1.67-75.2002.
- Orlandi, Viviana T, Fabrizio Bolognese, Luca Chiodaroli, Tim Tolker-Nielsen, and Paola Barbieri. 2015. "Pigments Influence the Tolerance of Pseudomonas Aeruginosa PAO1 to Photodynamically Induced Oxidative Stress.." *Microbiology* 161 (12): 2298–2309. doi:10.1099/mic.0.000193.
- Pereira, Rui P A, Jörg Peplies, Manfred G Höfle, and Ingrid Brettar. 2017. "Water Research." *Water Research* 122 (October). Elsevier Ltd: 363–76. doi:10.1016/j.watres.2017.06.011.
- Pine, L, J R George, M W Reeves, and W K Harrell. 1979. "Development of a Chemically Defined Liquid Medium for Growth of Legionella Pneumophila.." *Journal of Clinical Microbiology* 9 (5): 615–26.
- Price-Whelan, Alexa, Lars E P Dietrich, and Dianne K Newman. 2006. "Rethinking 'Secondary' Metabolism: Physiological Roles for Phenazine Antibiotics." *Nature Chemical Biology* 2 (2): 71–78. doi:10.1111/j.1365-2672.1992.tb01862.x.
- Ramírez, Fidel, Devon P Ryan, Björn Grüning, Vivek Bhardwaj, Fabian Kilpert, Andreas S Richter, Steffen Heyne, Friederike Dünder, and Thomas Manke. 2016. "deepTools2: a Next Generation Web Server for Deep-Sequencing Data Analysis." *Nucleic Acids Research* 44 (W1): W160–65. doi:10.1016/j.molcel.2013.12.029.
- Rao, Chitong, Hadas Benhabib, and Alexander W Ensminger. 2013. "Phylogenetic Reconstruction of the Legionella Pneumophila Philadelphia-1 Laboratory Strains Through Comparative Genomics." Edited by Dario S Zamboni. *PLoS ONE* 8 (5): e64129. doi:10.1371/journal.pone.0064129.t005.
- Rodriguez-Rojas, A, A Mena, S Martin, N Borrell, A Oliver, and J Blazquez. 2009. "Inactivation of the hmgA Gene of Pseudomonas Aeruginosa Leads to Pyomelanin Hyperproduction, Stress Resistance and Increased Persistence in Chronic Lung Infection." *Microbiology* 155 (4): 1050–57. doi:10.1111/j.1574-6968.1993.tb06120.x.
- Rowbotham, T J. 1980. "Preliminary Report on the Pathogenicity of Legionella Pneumophila for Freshwater and Soil Amoebae.." *Journal of Clinical Pathology*.
- Sadosky, A B, L A Wiater, and H A Shuman. 1993. "Identification of Legionella Pneumophila Genes Required for Growth Within and Killing of Human Macrophages.." *Infection and Immunity* 61 (12): 5361–73.
- Solomon, J M, and R R Isberg. 2000. "Growth of Legionella Pneumophila in Dictyostelium Discoideum: a Novel System for Genetic Analysis of Host–Pathogen Interactions." *Trends in Microbiology*.
- Steinert, M, H Engelhard, M Flügel, E Wintermeyer, and J Hacker. 1995. "The Lly Protein Protects Legionella Pneumophila From Light but Does Not Directly Influence Its Intracellular

- Survival in *Hartmannella Vermiformis*..” *Applied and Environmental Microbiology* 61 (6): 2428–30.
- Steinert, M, M Flügel, M Schuppler, J H Helbig, A Supriyono, P Proksch, and P C Lück. 2001. “The Lly Protein Is Essential for P-Hydroxyphenylpyruvate Dioxygenase Activity in *Legionella Pneumophila*..” *FEMS Microbiology Letters* 203 (1): 41–47.
- Stewart, C R, D M Burnside, and N P Cianciotto. 2011. “The Surfactant of *Legionella Pneumophila* Is Secreted in a TolC-Dependent Manner and Is Antagonistic Toward Other *Legionella* Species.” *Journal of Bacteriology* 193 (21): 5971–84. doi:10.1128/JB.05405-11.
- Stewart, C R, O Rossier, and N P Cianciotto. 2009. “Surface Translocation by *Legionella Pneumophila*: a Form of Sliding Motility That Is Dependent Upon Type II Protein Secretion.” *Journal of Bacteriology* 191 (5): 1537–46. doi:10.1128/JB.01531-08.
- Stewart, Catherine R, Viraj Muthye, and Nicholas P Cianciotto. 2012. “*Legionella Pneumophila* Persists Within Biofilms Formed by *Klebsiella Pneumoniae*, *Flavobacterium Sp.*, and *Pseudomonas Fluorescens* Under Dynamic Flow Conditions.” Edited by Dario S Zamboni. *PLoS ONE* 7 (11): e50560. doi:10.1371/journal.pone.0050560.g004.
- Taylor, Kristin Ross, and Richard Bentham. 2013. “Spatial Arrangement of *Legionella* Colonies in Intact Biofilms From a Model Cooling Water System.” *Microbiology Insights*, July, 49. doi:10.4137/MBI.S12196.
- Tiaden, André, Thomas Spirig, Stefan S Weber, Holger Brüggemann, Rachel Bosshard, Carmen Buchrieser, and Hubert Hilbi. 2007. “The *Legionella Pneumophila* Response Regulator LqsR Promotes Host Cell Interactions as an Element of the Virulence Regulatory Network Controlled by RpoS and LetA.” *Cellular Microbiology* 9 (12): 2903–20. doi:10.1111/j.1462-5822.2007.01005.x.
- Tobias, Nicholas J, Tilman Ahrendt, Ursula Schell, Melissa Miltenberger, Hubert Hilbi, and Helge B Bode. 2016. “*Legionella* Shows a Diverse Secondary Metabolism Dependent on a Broad Spectrum Sfp-Type Phosphopantetheinyl Transferase..” *PeerJ* 4: e2720. doi:10.7717/peerj.2720.
- Wan, Xuehua, Alex J Lee, Shaobin Hou, Blake Ushijima, Yen P Nguyen, Jessica A Thawley, and Stuart P Donachie. 2016. “Draft Genome Sequence of *Piscirickettsia Litoralis*, Isolated From Seawater..” *Genome Announcements* 4 (6). doi:10.1128/genomeA.01252-16.
- Wery, N, V Bru-Adan, C Minervini, J P Delgenes, L Garrelly, and J J Godon. 2008. “Dynamics of *Legionella Spp.* and Bacterial Populations During the Proliferation of *L. Pneumophila* in a Cooling Tower Facility.” *Applied and Environmental Microbiology* 74 (10): 3030–37. doi:10.1128/AEM.02760-07.
- Wiater, L A, A B Sadosky, and H A Shuman. 1994. “Mutagenesis of *Legionella Pneumophila* Using Tn903 dIIIacZ: Identification of a Growth-Phase-Regulated Pigmentation Gene..” *Molecular Microbiology* 11 (4): 641–53.
- Yanagisawa, Tatsuo, Tomomi Sumida, Ryohei Ishii, Chie Takemoto, and Shigeyuki Yokoyama. 2010. “A Paralog of Lysyl-tRNA Synthetase Aminoacylates a Conserved Lysine Residue in Translation Elongation Factor P..” *Nature Structural & Molecular Biology* 17 (9): 1136–43. doi:10.1038/nsmb.1889.
- Zheng, H, C H Chatfield, M R Liles, and N P Cianciotto. 2013. “Secreted Pyomelanin of *Legionella Pneumophila* Promotes Bacterial Iron Uptake and Growth Under Iron-Limiting Conditions.” *Infection and Immunity* 81 (11): 4182–91. doi:10.1128/IAI.00858-13.

## Supplemental Figure and Table legends

### Supplemental Figure 1. Separation of surfactant and antimicrobial phenotypes.

A) *Lm* inhibition sometimes co-occurs with contact with WT *Lp*'s secreted surfactant (left), but sometimes is observable outside of the surfactant front (right). The leading edge of the surfactant front (arrowheads) is faintly visible when light is reflected off adjacent regions of the

plate (“light”). Each image is a composite of two fields of view, with inverted colors to enable visualization of the surfactant front. B) Lack of surfactant production from *Lp* with a deletion of *bbcB*, evident by a defect in spreading on BCYE plates. C) The *bbcB* mutant can inhibit the growth of neighboring *Lm*, despite lacking surfactant secretion.

**Supplemental figure 2.** Genetic validation linking inhibition-defective mutants to the HGA-melanin pathway. A) Inter-bacterial inhibition does not correlate with surface spreading. For example, two mutants with transposon insertions in *lpg1874* (general secretion system protein L) and *lpg1875* (general secretion system protein M) share “small zone” inhibition phenotypes, yet show opposite spreading phenotypes on BCYE. B) Overexpression of either *hisC2* or *hpd* from a plasmid was sufficient to complement the “no zone” phenotype in all recovered mutants. B) Unlike mutations to *hisC2*, deletion of the *hmgA* gene does not disrupt *Lm* inhibition, showing that the intracellular recycling of HGA is not required for inhibitor production. Colors in images from B and C were inverted to facilitate visualization of the zone of inhibition. D) Pigmentation of AYE media following 48 hours growth of various *Legionella* species. While multiple species produce some pigment, many are less pigmented than *L. pneumophila*. The *L. micdadei* susceptible strain does not secrete detectable pigment. E) After 48 hours growth in AYE, none of the “no zone” mutants (represented here by *hisC2::Tn*) produce pigment. A subset of “small zone” mutants also have pigmentation defects (e.g. *lpg2872::Tn* and *lpg1875::Tn*), further implicating the HGA-melanin pathway in inhibition.

**Supplemental Figure 3.** Impacts of chemical compounds on HGA-mediated inhibition of *Legionella*. A) HGA inhibits *Lm* growth but HGA-related compounds do not. Chemical names and structures are shown above the corresponding plates. On each plate, different concentrations of each compound were spotted onto a lawn of *Lm* in 10 $\mu$ L droplets, arranged as indicated at the right. B) Addition of catalase does not rescue *Lm* susceptibility to 250 $\mu$ M HGA. C) Control experiment showing catalase is active, based on its ability to protect *Lp* from H<sub>2</sub>O<sub>2</sub>. D) Quantification of HGA’s ability to oxidize cysteine. Data points are in purple, with a linear line of best fit. A 1:1 line is shown in gray, for reference. E) The potency of HGA is decreased when pre-incubated with reducing agents. 100mM HGA was mixed with dithiothreitol (DTT), oxidized glutathione (Ox. Glut), or reduced glutathione (R. Glut) for 15 minutes prior to spotting 10 $\mu$ L onto a lawn of *Lm* and allowing to grow for 3 days. Key below each image indicates where each solution was added.

**Supplemental Figure 4.** HGA-induced growth delays and quantification of HGA production. A-B) Growth curves of *Lp* strains upon exposure to HGA. For each experiment, we provide a matched wild type (KS79) control for comparison. A) Clinical isolate Philadelphia-1 and lab strain KS79 exhibited nearly identical growth curves in the presence of HGA. B) The  $\Delta$ *hmgA* deletion strain responded to HGA similarly to wild type KS79, showing that HmgA-C do not play a significant role in HGA susceptibility. C) Viable CFU counts of KS79 *Lp* exposed to HGA. Even at high HGA concentrations, in rich media HGA is bacteriostatic at early time points, followed by population recovery. D-F) Using standard curves of synthetic HGA to estimate the amount of HGA secreted by *Lp*. D) OD400 was used to track the oxidation of synthetic HGA in AYE media. The 24 hour timepoint (arrow) was used for the standard curve and all experiments estimating HGA concentrations, as the HGA had completed oxidation by this point. E) Standard curve showing OD400 of oxidized synthetic HGA used to estimate the amount of HGA secreted into *Lp* conditioned media after 48 hours growth. The equation for the linear regression is shown along with a table with the OD400 readings and estimated HGA concentrations for each sample. F) Similar standard curve used for time course experiment of HGA secretion in wild type *Lp* in Figure 6. Standard curves were generated for each experiment independently, in parallel with experimental samples.



**Supplemental Figure 5.** Growth curves of *lpg1681* *Lp* strains upon exposure to HGA. For each experiment we provide a matched wild type (KS79) control for comparison. The spontaneous *lpg1681* mutant and the deletion mutant both had less severe growth delays from HGA than wild type. Conversely, the *lpg1681* overexpression strain was sensitized to HGA, with longer growth delays than wild type. Dashed gray line shows time for the 250  $\mu$ M HGA condition to reach an OD of 0.1, to facilitate comparisons.

**Supplemental Figure 6.** Evolution of genes in the *lpg1681* locus among A) *Legionella* species and B) the fish pathogen *Piscirickettsia*. In the species that carry hypothetical gene *lpg1681*, it always resides upstream of the thiol:disulfide interchange gene *dsbD2*, despite extensive turnover of neighboring genes. Species separated by a “/” have similar syntenic loci. Annotated genes are colored, with redox-related genes in shades of blue. Hypothetical genes are white. Gray shading indicates gene homology among the species.

**Supplemental Figure 7.** Density-dependent HGA resistance acts independently of bulk cellular material, the *lqsR* quorum sensing pathway, and the stringent response pathway. A) The presence of dense heat-killed bacteria is not sufficient to protect dilute, live *Lp* cells from HGA inhibition. B) The susceptibility of wild type *Lp* (KS79) is nearly identical to that of *Lp* with a deletion of *lqsR*, the proposed quorum sensing response regulator in *L. pneumophila*. C) Schematic illustrating part of the stringent response pathway in *L. pneumophila*. In low nutrient conditions, RelA and SpoT generate the alarmone ppGpp, which activates a variety of downstream stress responses via the LetA/LetS two component system and the RpoS sigma factor. D) *L. pneumophila* stringent response mutants show similar, density-dependent susceptibility to HGA as wild type. Complementation of *relAspoT*, *rpoS*, and *letA* mutants by plasmid expression (with pSpoT, pRpoS, and pLetA respectively) similar had little effect on HGA inhibition.

**Supplemental table 1:** Transposon mutants of *L. pneumophila* with defects in *L. micdadei* inhibition. \*The transposon insertions were mapped to a window that overlapped with both genes noted.

**Supplemental table 2:** Strains and plasmids

**Supplemental table 3:** Primers used for cloning
